# Supplementary material for: Inconsistencies in the Classification of the Family Cydnidae (Hemiptera: Heteroptera: Pentatomoidea) Revealed by Molecular Apomorphies in the Secondary and Tertiary Structures of 18S rRNA Length-Variable Region L (LVR L)
Source: MDPI journal article supplement (doi:10.3390/ijms25020939), 2024-01-11

| Global Quality Analysis (16) |       |                      |                      |           |            |                 |            |             |        |                |                                                                                       |
|------------------------------|-------|----------------------|----------------------|-----------|------------|-----------------|------------|-------------|--------|----------------|---------------------------------------------------------------------------------------|
| Model                        | RMSD  | Cutoff<br>sphere 12Å | Cutoff<br>sphere 16Å | INF<br>WC | INF<br>nWC | INF<br>stacking | INF<br>all | P-<br>value | DI all | Clash<br>Score | Deformation<br>Proile                                                                 |
| Adomerus.pdb                 | 6.82  | 29%                  | 9%                   | 0.00      | 0.00       | 0.00            | 0.00       | 0.96        | 0.00   | 9.45           | 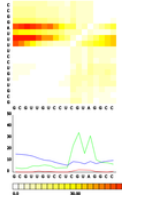   |
| Adrisa.pdb                   | 7.73  | 25%                  | 4%                   | 0.00      | 0.00       | 0.00            | 0.00       | 0.98        | 0.00   | 18.40          |    |
| Amaurocoris.pdb              | 11.33 | 25%                  | 2%                   | 0.00      | 0.00       | 0.00            | 0.00       | 1.00        | 0.00   | 13.74          |    |
| Amnestus.pdb                 | 15.12 | 13%                  | 2%                   | 0.00      | 0.00       | 0.00            | 0.00       | 1.00        | 0.00   | 18.33          |   |
| Chilocoris.pdb               | 11.73 | 13%                  | 1%                   | 0.00      | 0.00       | 0.00            | 0.00       | 1.00        | 0.00   | 19.22          |  |

| Model           | Global Quality Analysis (16) |                      |                      |           |            |                 |            |             |        |                | Deformation<br>Proile                                                                 |
|-----------------|------------------------------|----------------------|----------------------|-----------|------------|-----------------|------------|-------------|--------|----------------|---------------------------------------------------------------------------------------|
|                 | RMSD                         | Cutoff<br>sphere 12Å | Cutoff<br>sphere 16Å | INF<br>WC | INF<br>nWC | INF<br>stacking | INF<br>all | P-<br>value | DI all | Clash<br>Score |                                                                                       |
| Cydnus.pdb      | 8.47                         | 17%                  | 4%                   | 0.00      | 0.00       | 0.00            | 0.00       | 0.99        | 0.00   | 16.71          | 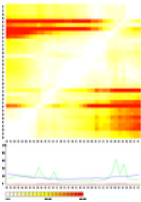   |
| Cyrtomenus.pdb  | 5.88                         | 42%                  | 2%                   | 0.00      | 0.00       | 0.00            | 0.00       | 0.73        | 0.00   | 15.20          |    |
| Fromundus.pdb   | 6.58                         | 42%                  | 14%                  | 0.03      | 0.00       | 0.00            | 0.03       | 0.84        | 262.59 | 18.57          |    |
| Garsauria.pdb   | 6.85                         | 41%                  | 12%                  | 0.00      | 0.09       | 0.00            | 0.02       | 0.80        | 294.46 | 14.31          |   |
| Macroscytus.pdb | 6.46                         | 37%                  | 2%                   | 0.03      | 0.00       | 0.00            | 0.02       | 0.83        | 274.58 | 18.59          |  |

| Global Quality Analysis (16) |      |                      |                      |           |            |                 |            |             |        |                |                                                                                       |
|------------------------------|------|----------------------|----------------------|-----------|------------|-----------------|------------|-------------|--------|----------------|---------------------------------------------------------------------------------------|
| Model                        | RMSD | Cutoff<br>sphere 12Å | Cutoff<br>sphere 16Å | INF<br>WC | INF<br>nWC | INF<br>stacking | INF<br>all | P-<br>value | DI all | Clash<br>Score | Deformation<br>Proile                                                                 |
| Ochetostethomorpha.pdb       | 9.81 | 30%                  | 13%                  | 0.00      | 0.00       | 0.00            | 0.00       | 1.00        | 0.00   | 12.45          | 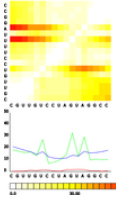   |
| Parastrachia.pdb             | 7.17 | 30%                  | 9%                   | 0.00      | 0.00       | 0.20            | 0.02       | 0.97        | 308.20 | 17.62          |    |
| Pseudoscoparipe.pdb          | 6.70 | 29%                  | 6%                   | 0.00      | 0.00       | 0.00            | 0.00       | 0.96        | 0.00   | 19.70          |    |
| Rhytidoporus.pdb             | 5.47 | 49%                  | 13%                  | 0.00      | 0.00       | 0.00            | 0.00       | 0.71        | 0.00   | 17.34          |   |
| Stibaropus.pdb               | 6.49 | 42%                  | 12%                  | 0.03      | 0.00       | 0.00            | 0.03       | 0.87        | 251.65 | 19.41          |  |

| Global Quality Analysis (16) |      |                      |                      |           |            |                 |            |             |        |                |                       |
|------------------------------|------|----------------------|----------------------|-----------|------------|-----------------|------------|-------------|--------|----------------|-----------------------|
| Model                        | RMSD | Cutoff<br>sphere 12Å | Cutoff<br>sphere 16Å | INF<br>WC | INF<br>nWC | INF<br>stacking | INF<br>all | P-<br>value | DI all | Clash<br>Score | Deformation<br>Proile |
| Thyreocoris.pdb              | 6.28 | 29%                  | 5%                   | 0.04      | 0.00       | 0.00            | 0.02       | 0.84        | 260.35 | 19.86          |                       |

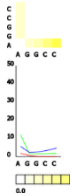

**Averaged**

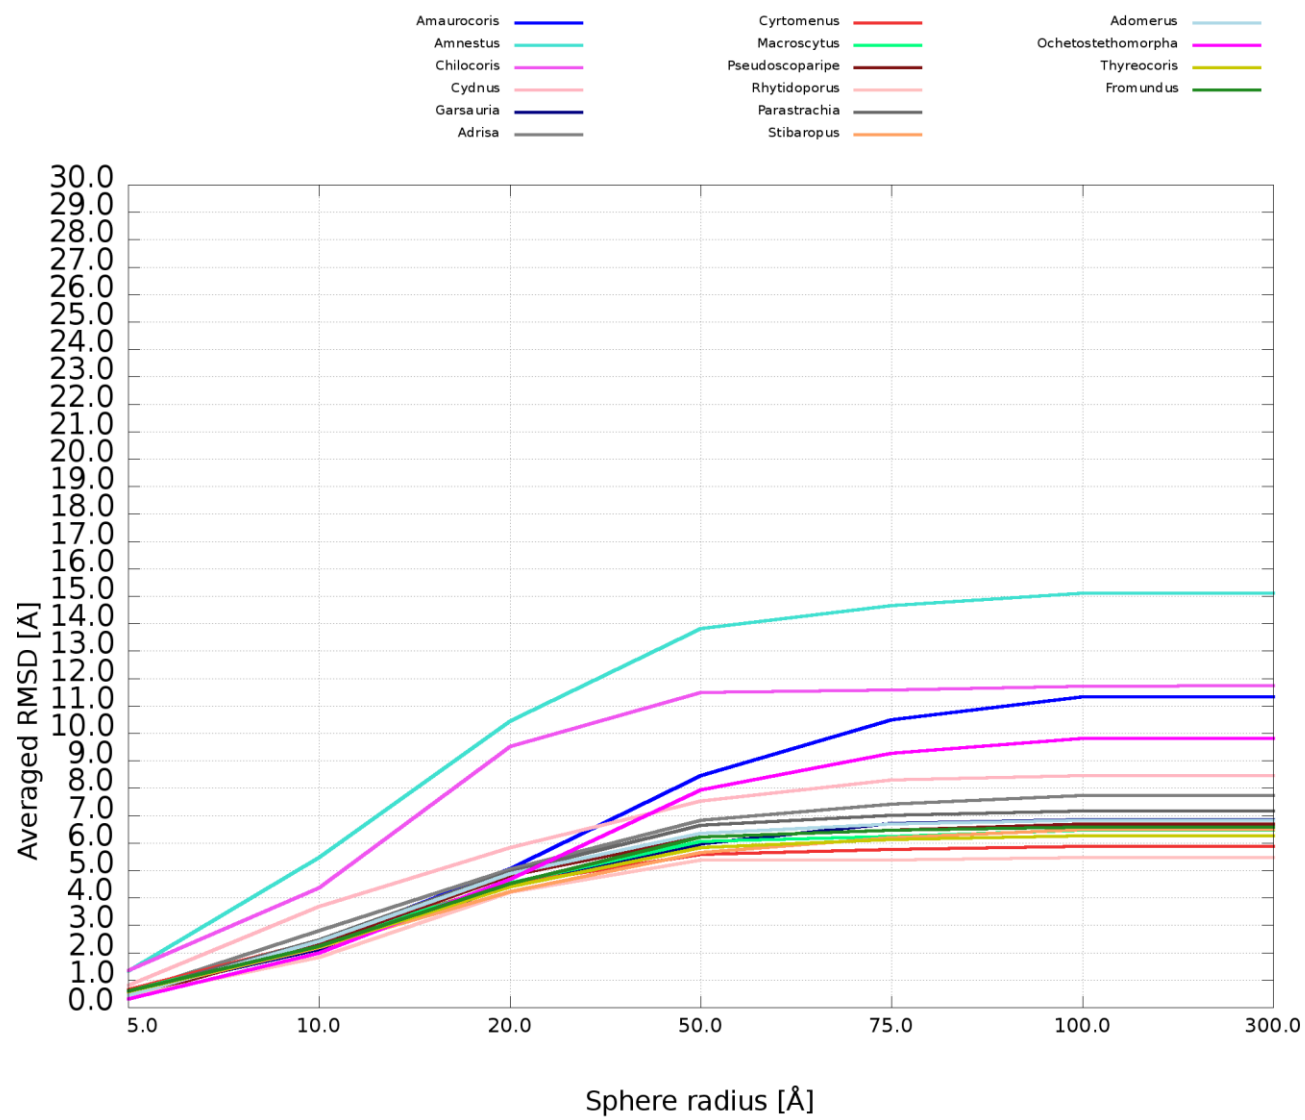

**Cutoff 2Å**

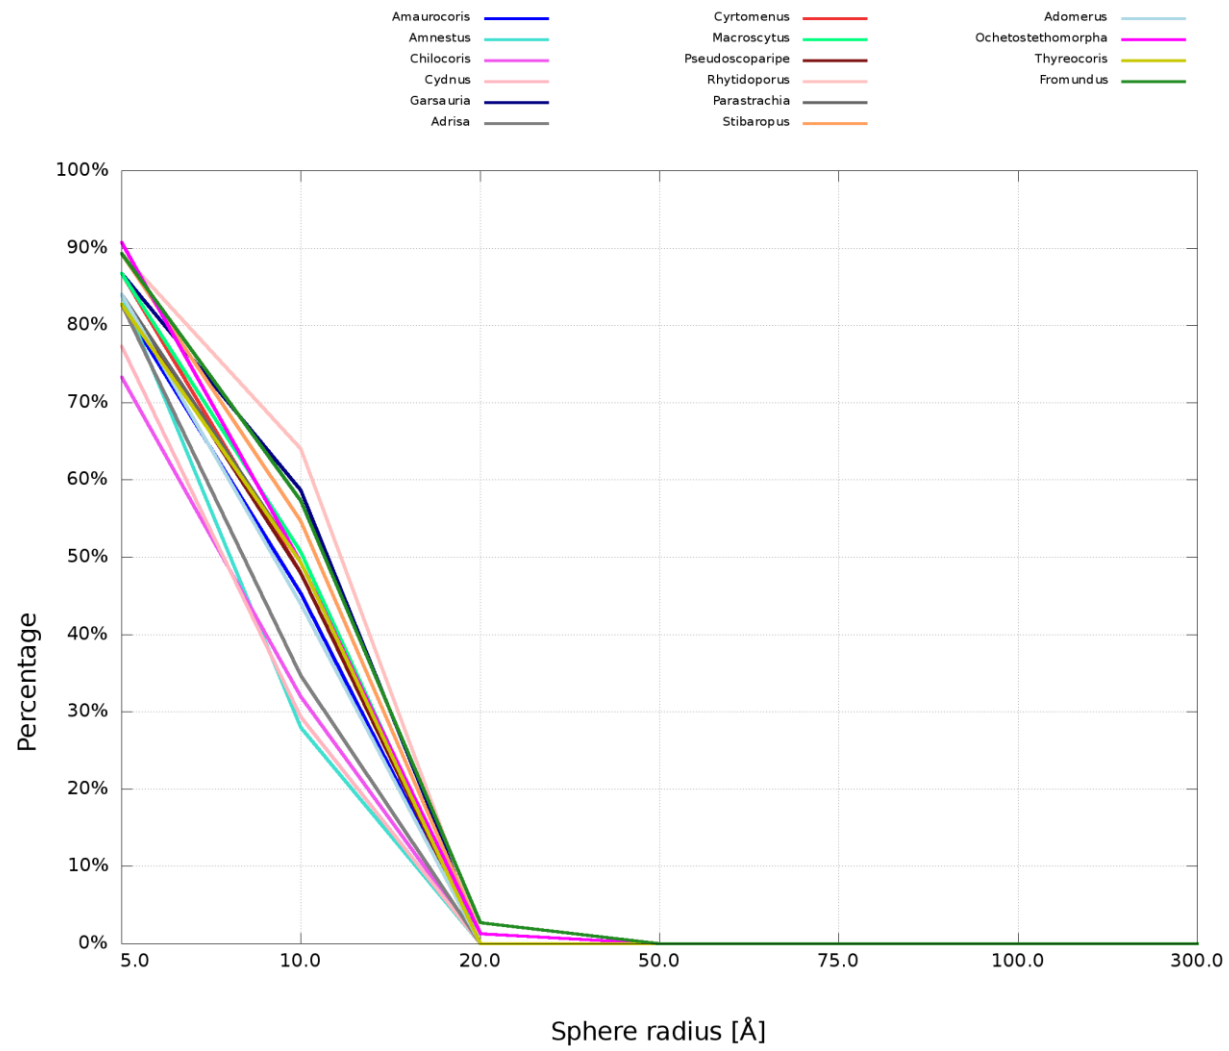

Multi-model for 5Å

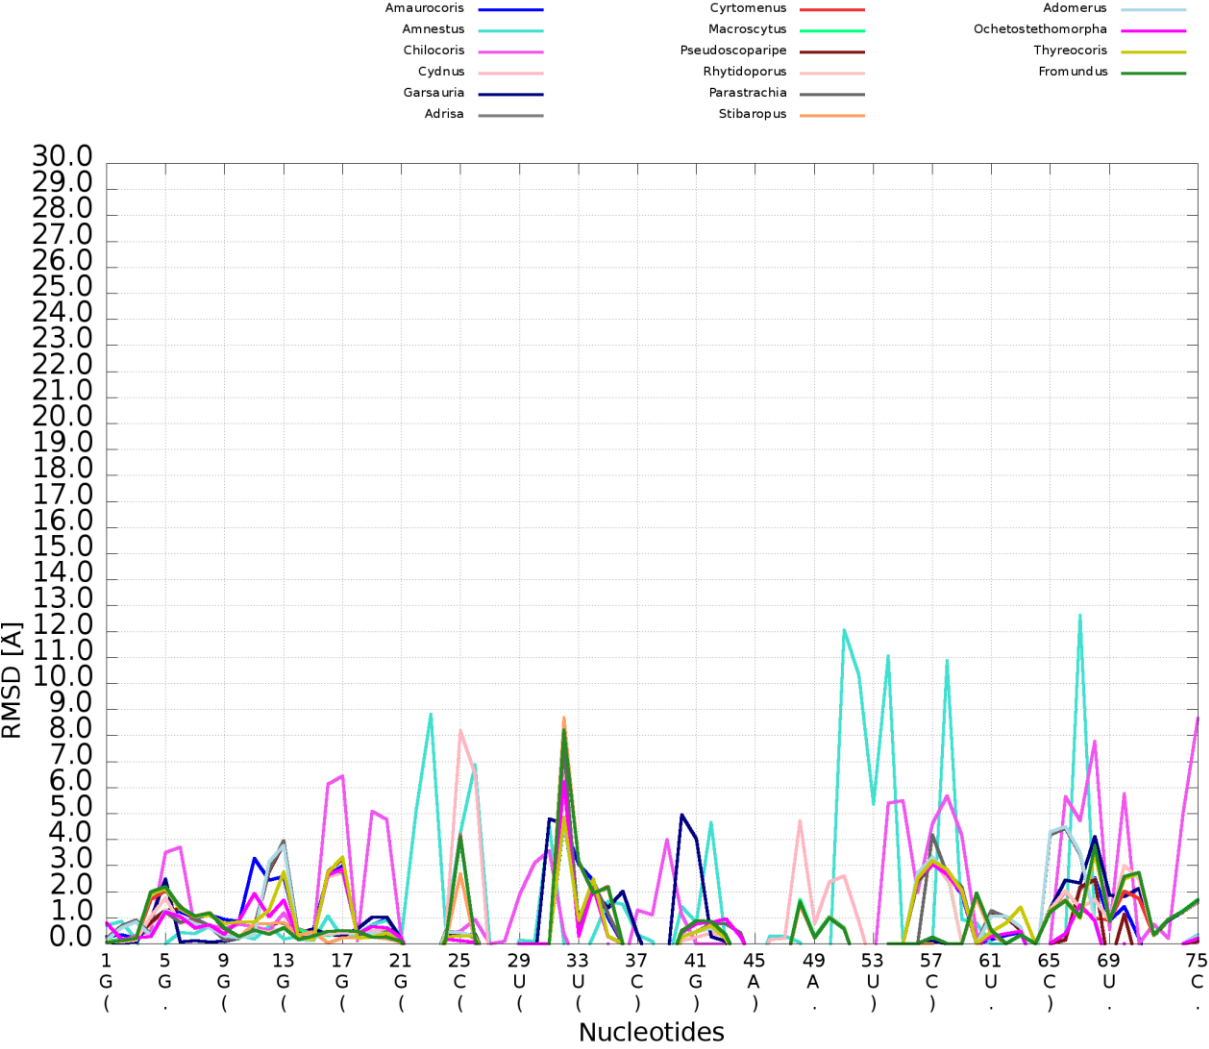

Multi-model for 10Å

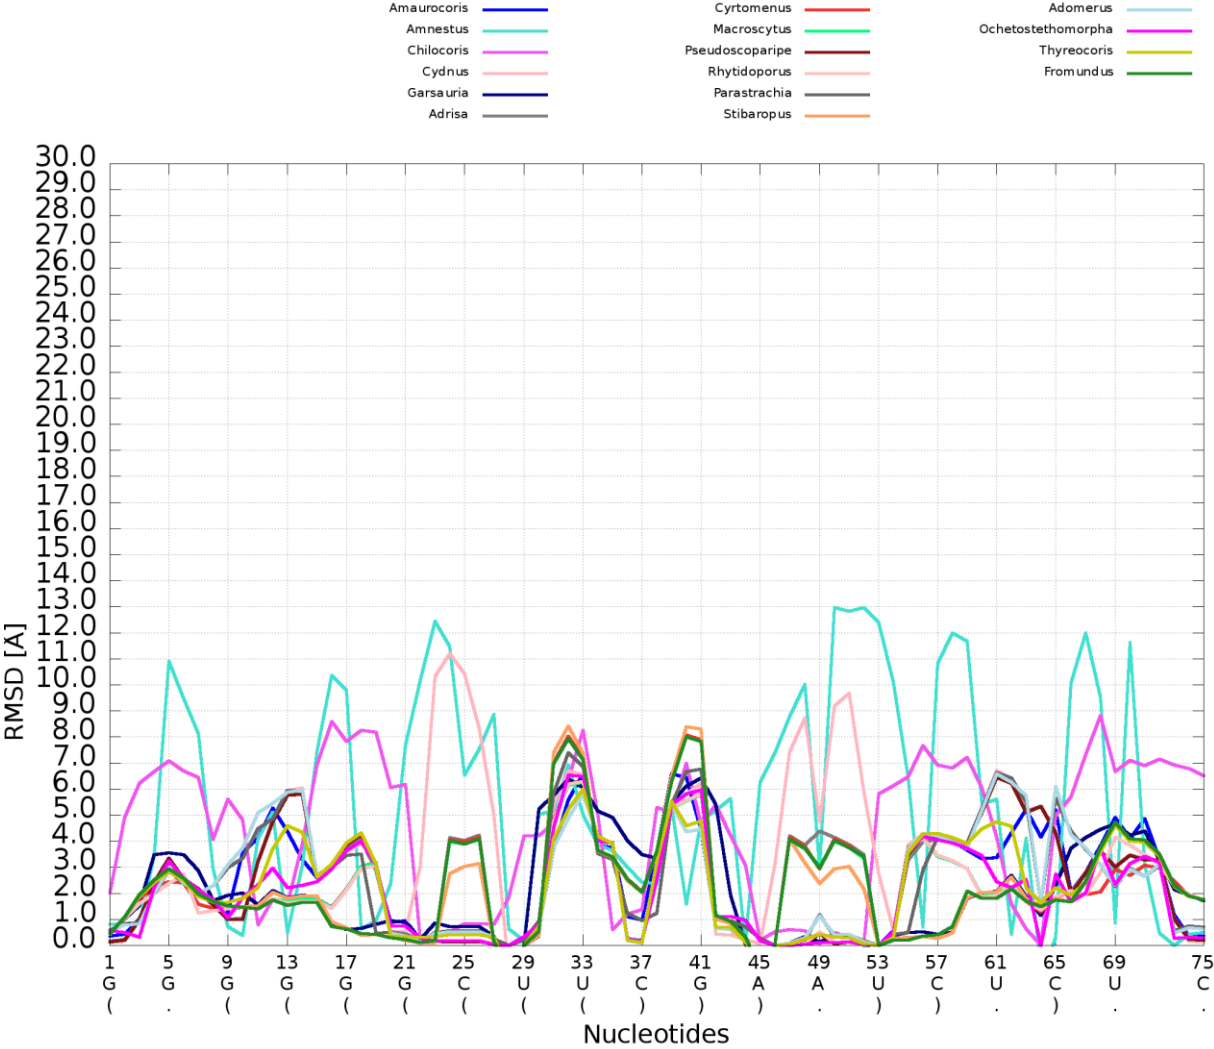



## Multi-model for 20Å

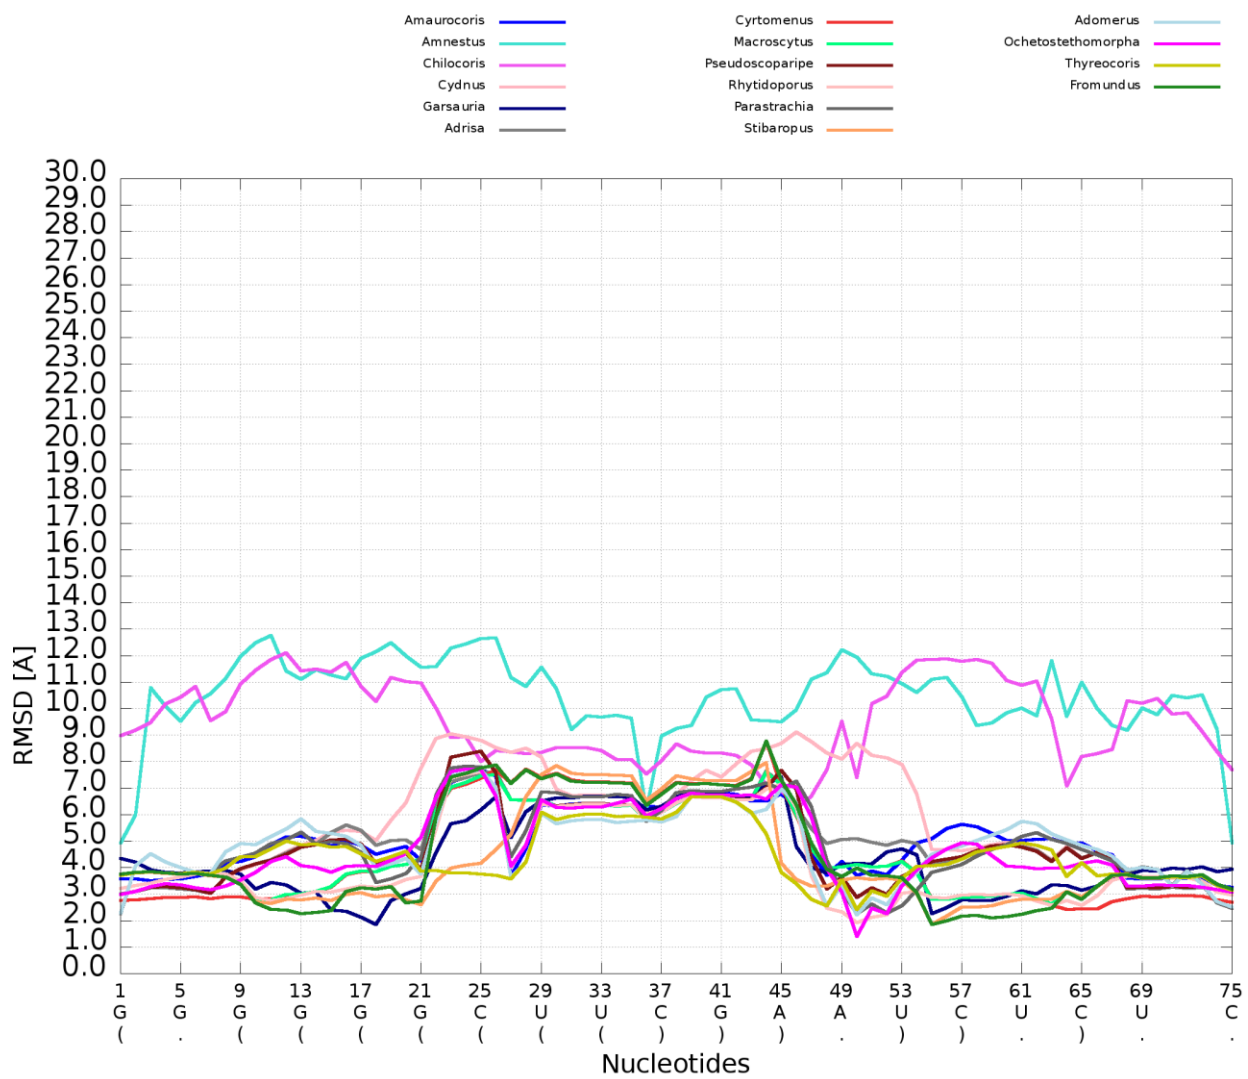

Multi-model for 50Å

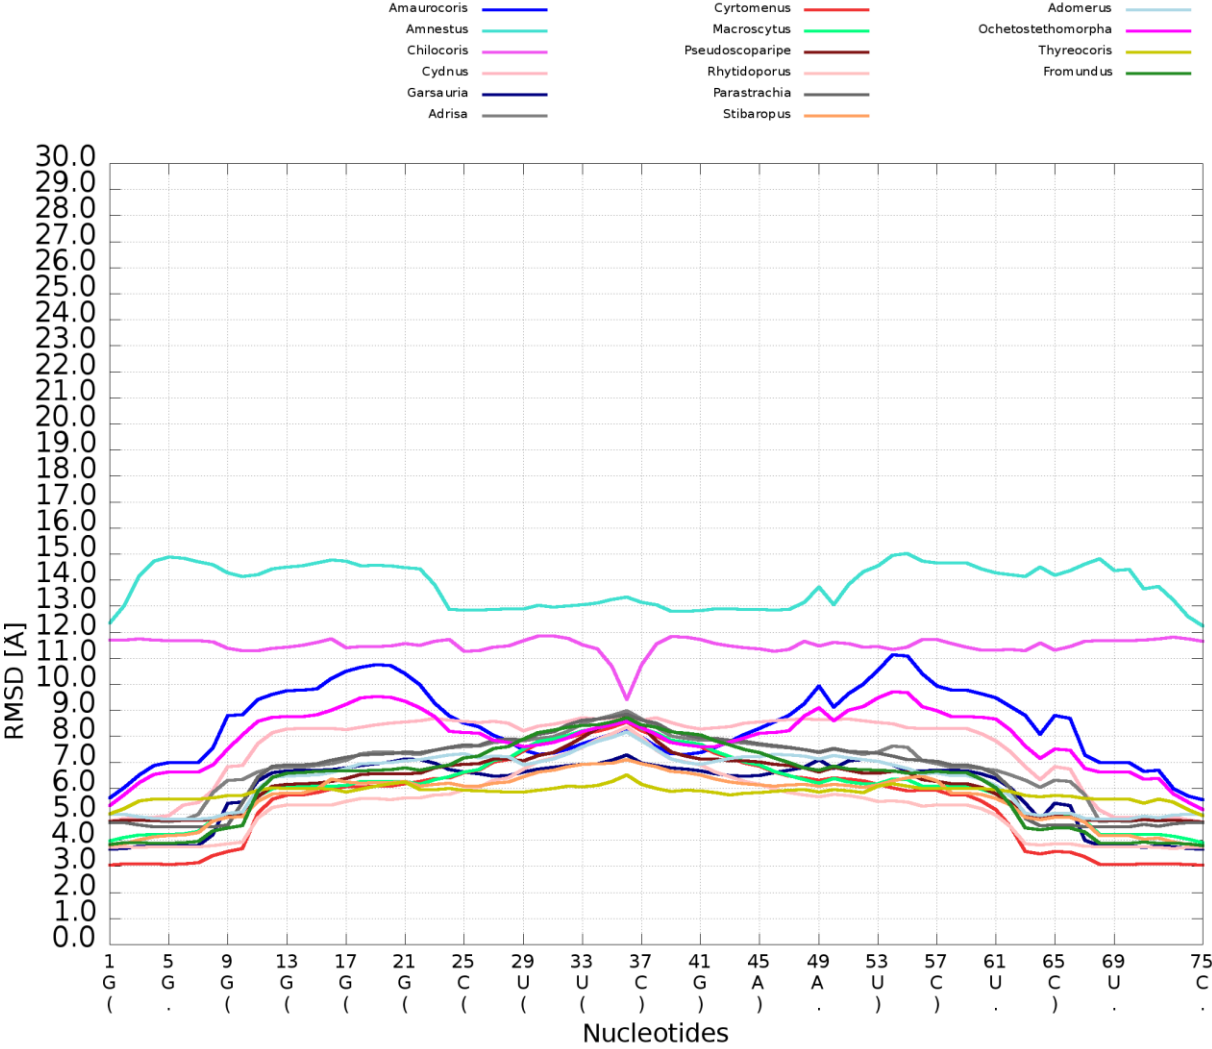

Multi-model for 75Å

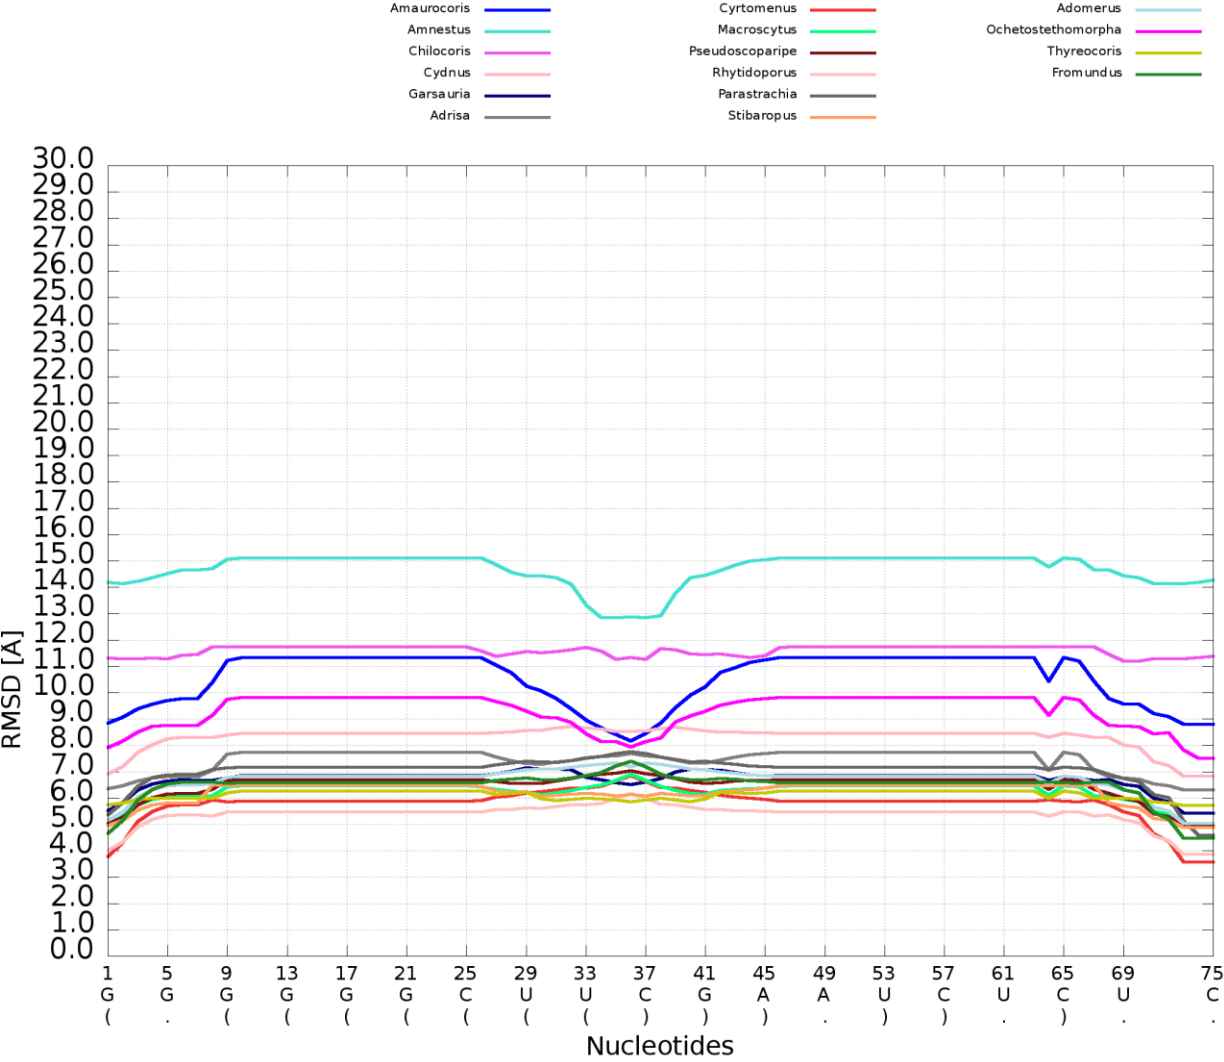

Multi-model for 100Å

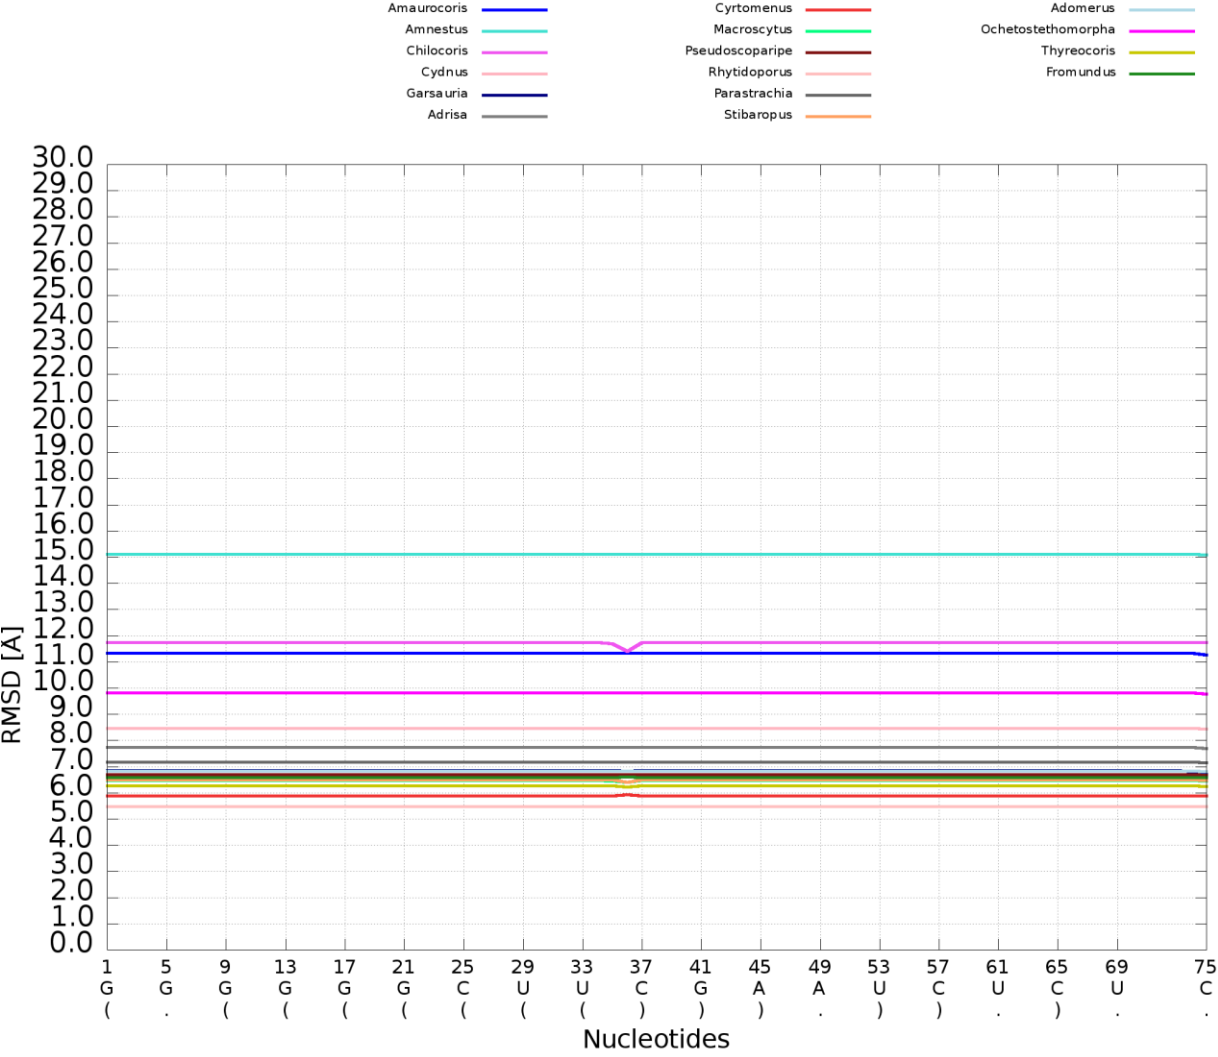

Models (16)

Model

2D map

3D plot

Adomerus.pdb

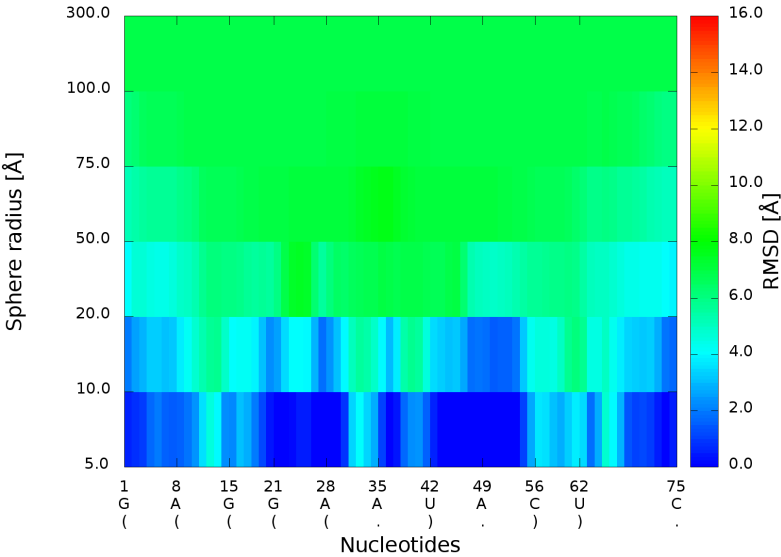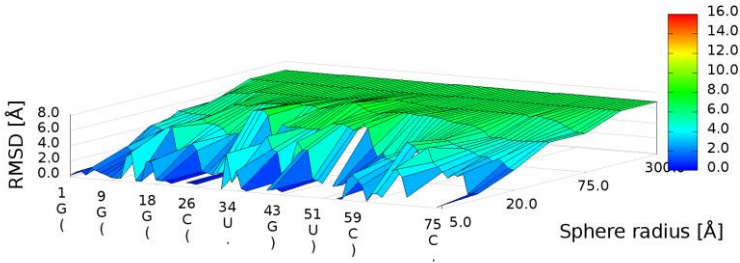

Nucleotides [ResNo, ResName, SS]

Adrisa.pdb

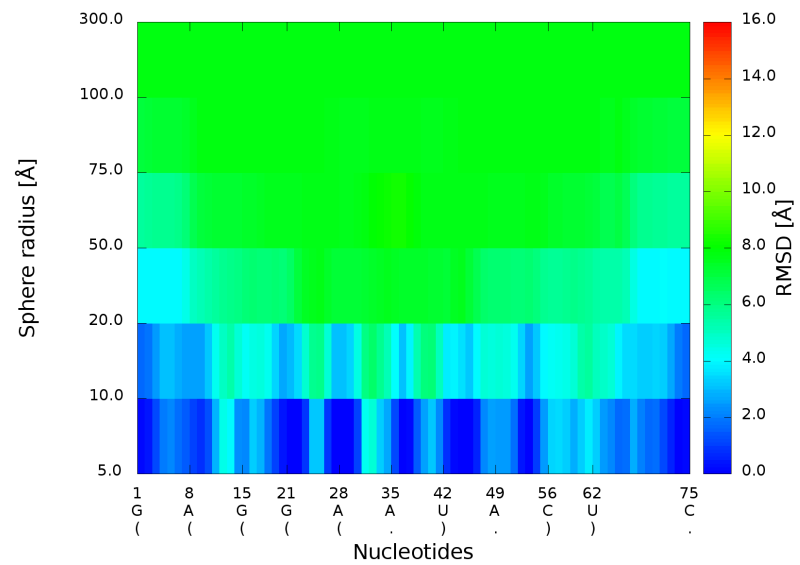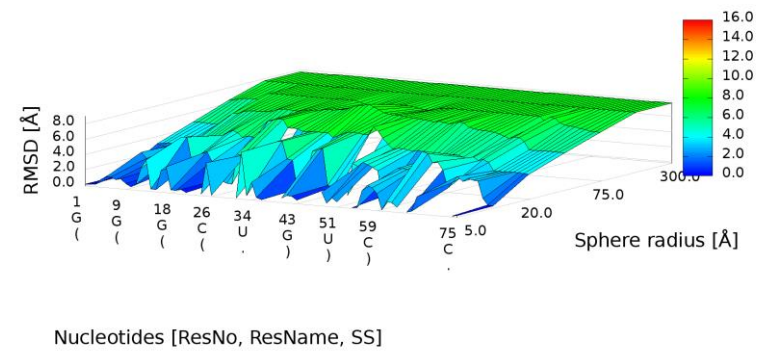

Amaurocoris.pdb

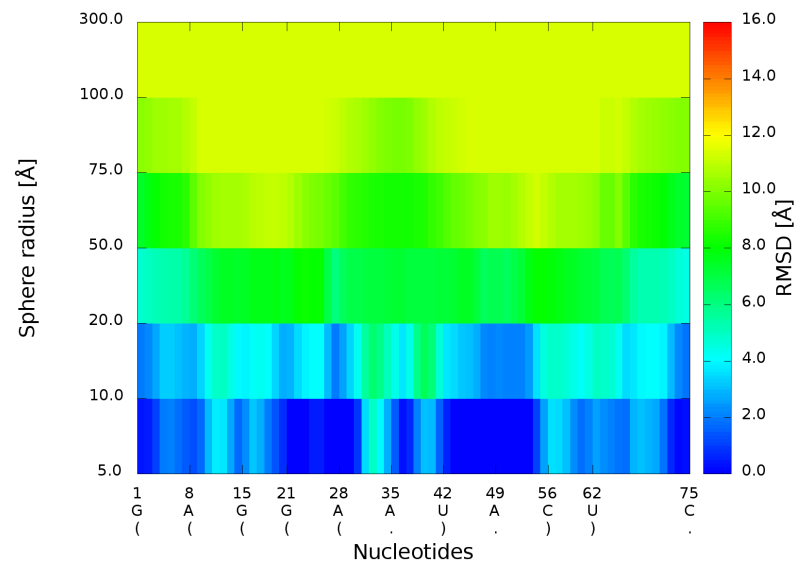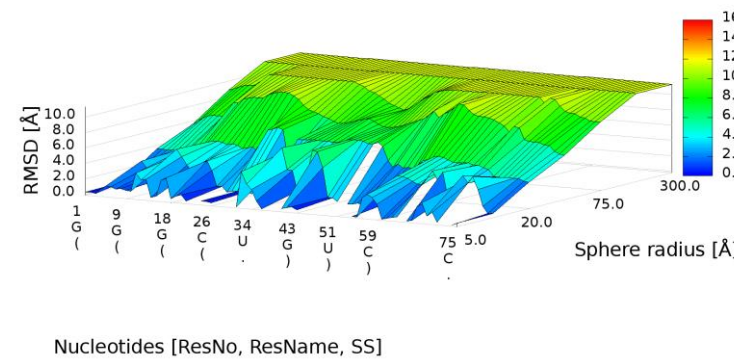

Amnestus.pdb

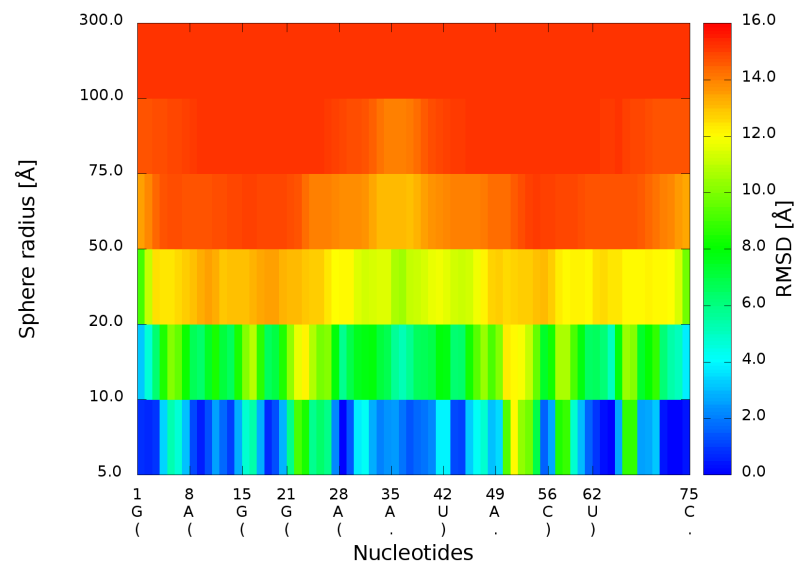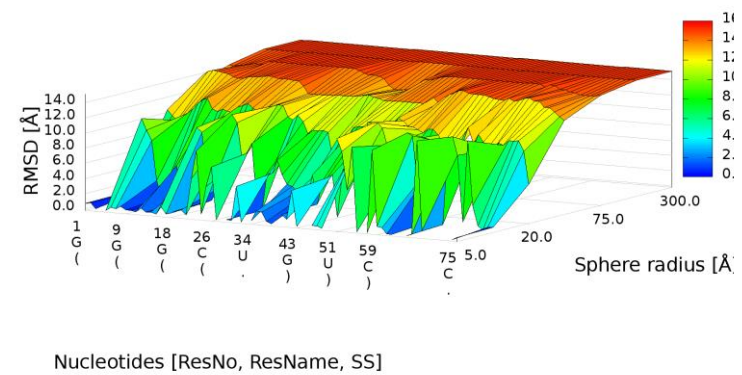



Chilocoris.pdb

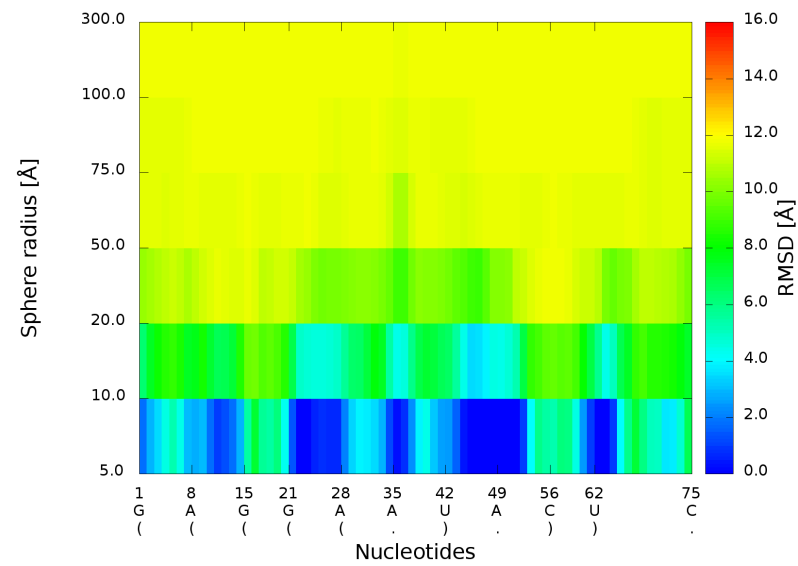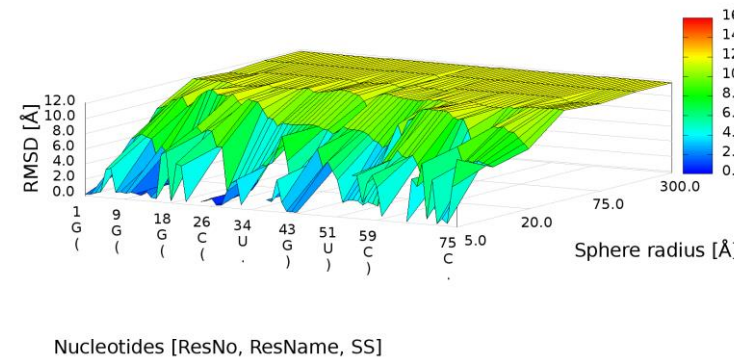

Cydnus.pdb

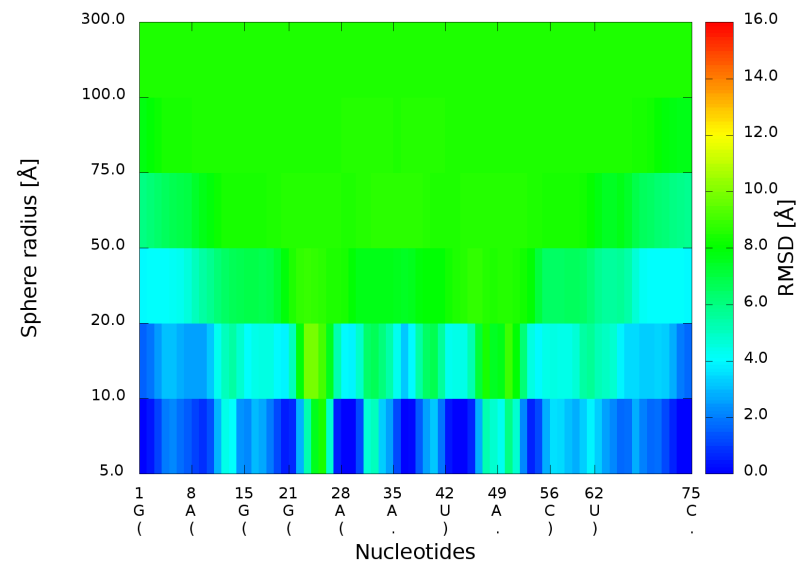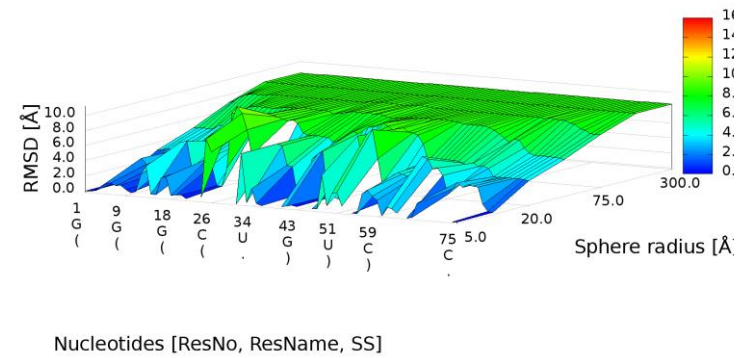

Cyrtomenus.pdb

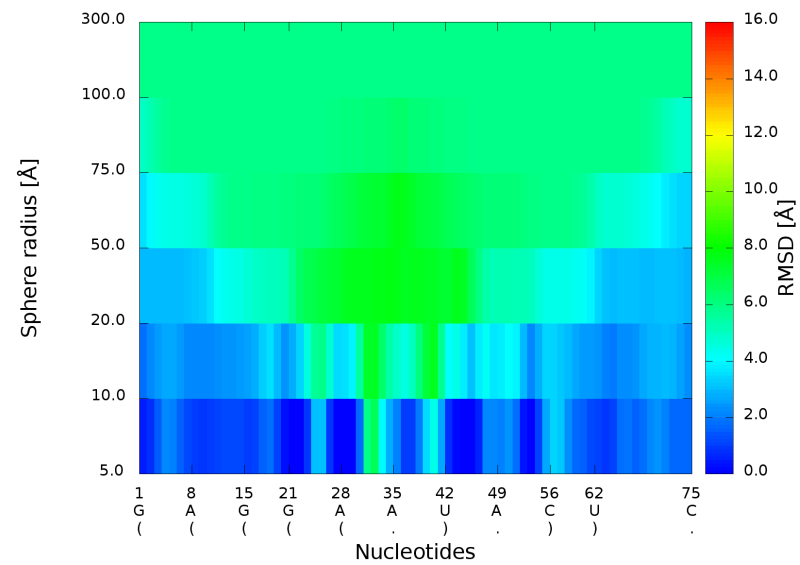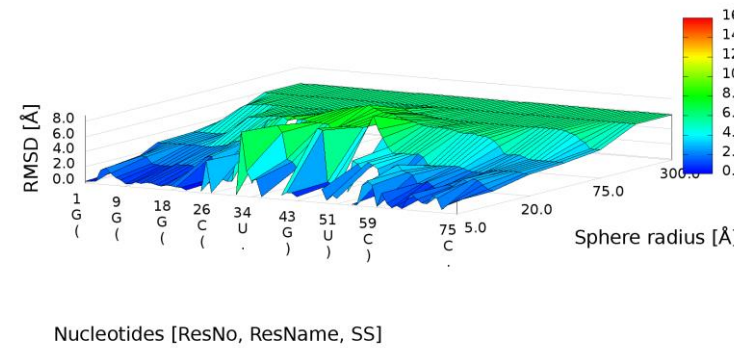

Fromundus.pdb

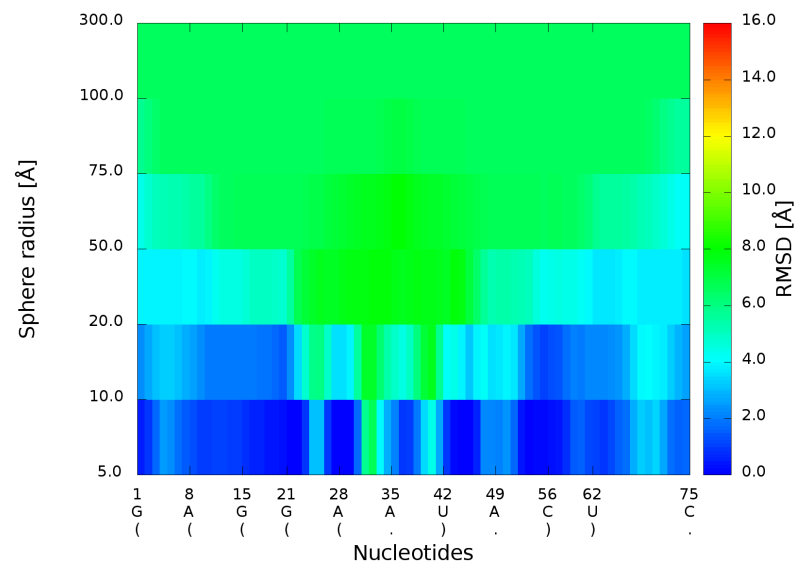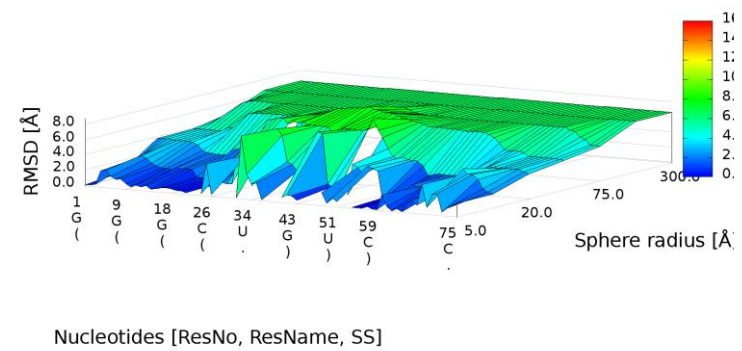

Garsauria.pdb

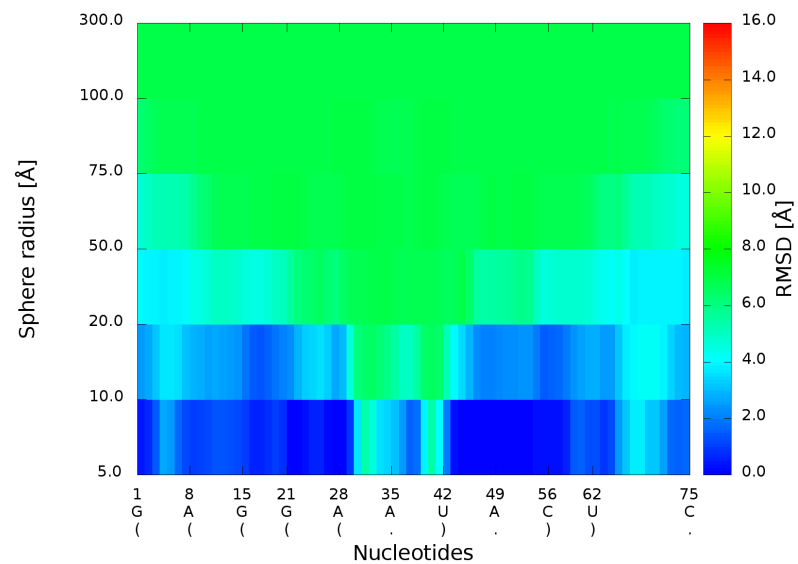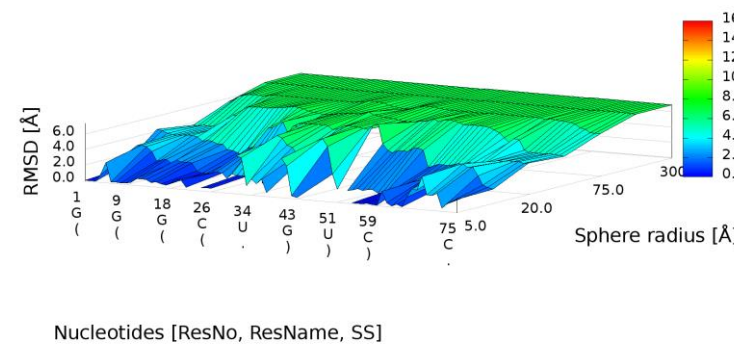

Macroscytus.pdb

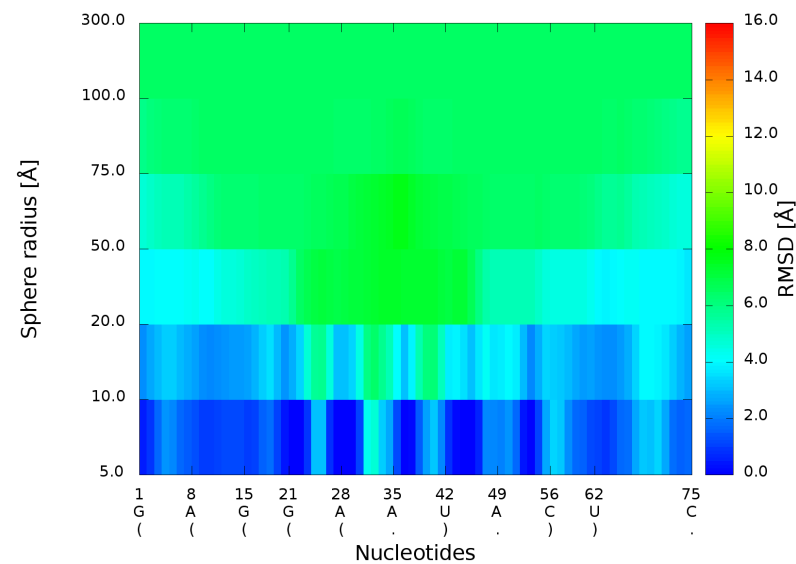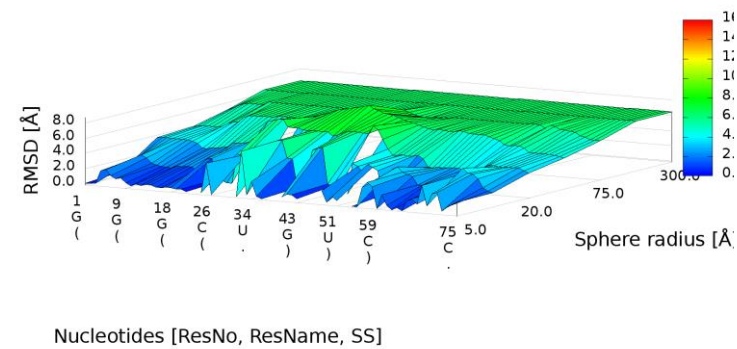

Ochetostethomorpha.p  
db

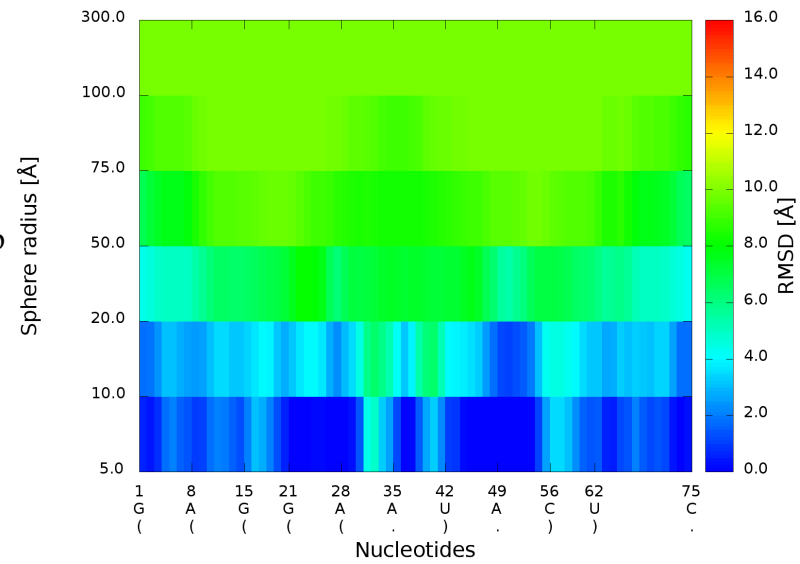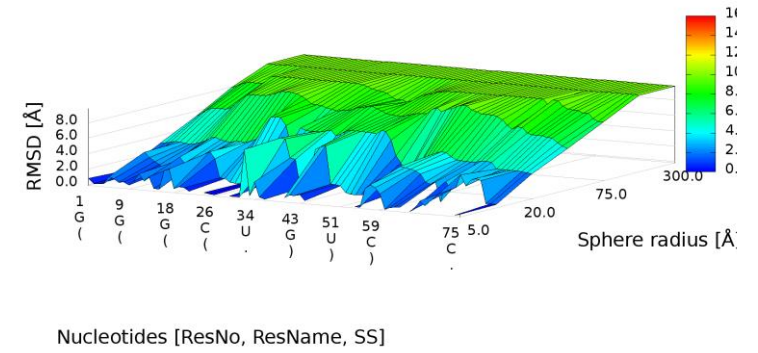

Parastrachia.pdb

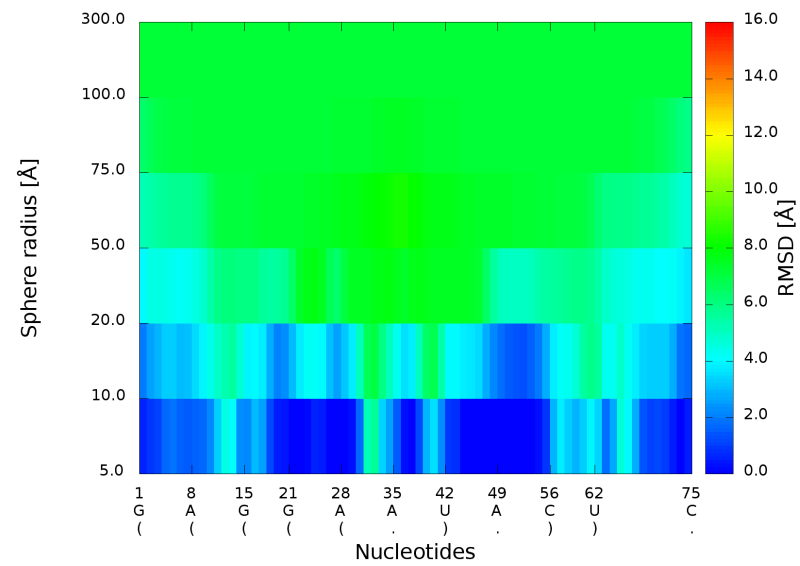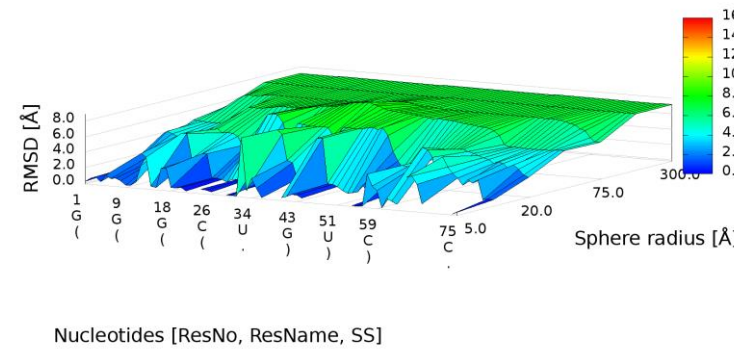



Pseudoscoparipes.pdb

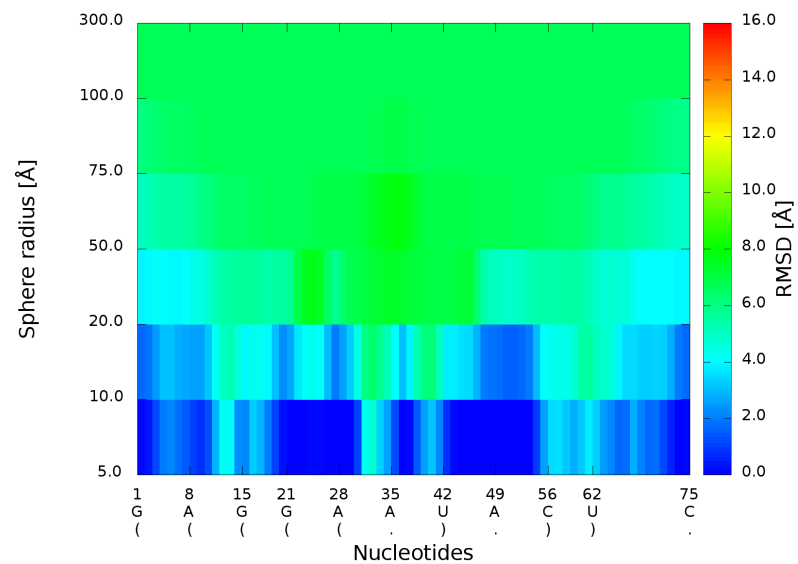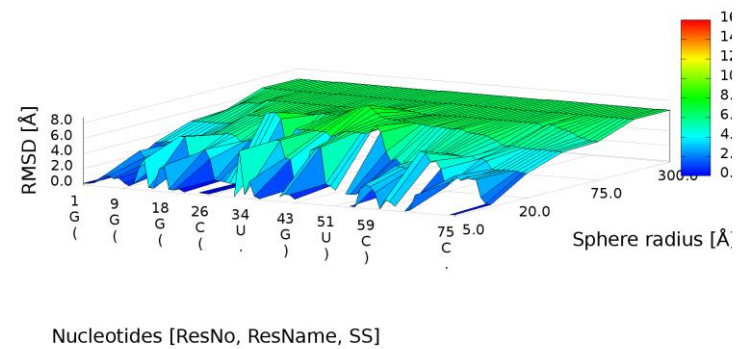

Rhytidoporus.pdb

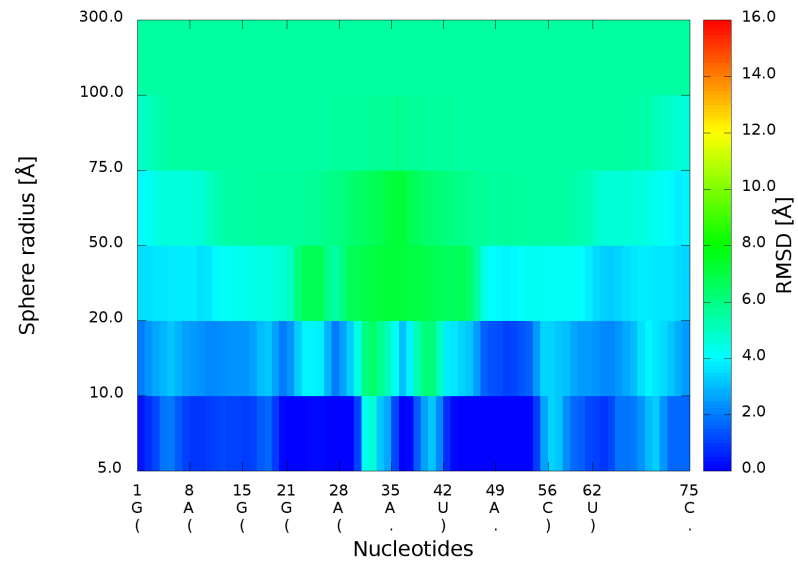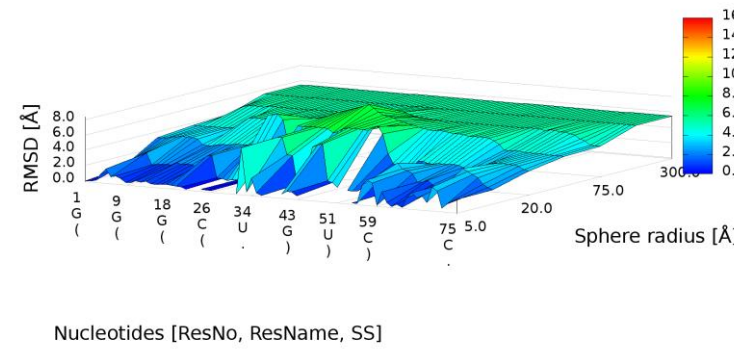

Stibaropus.pdb

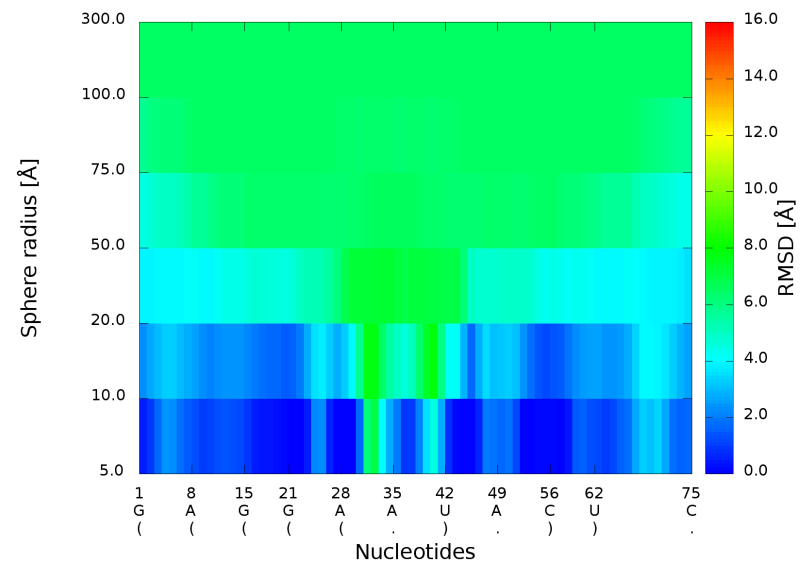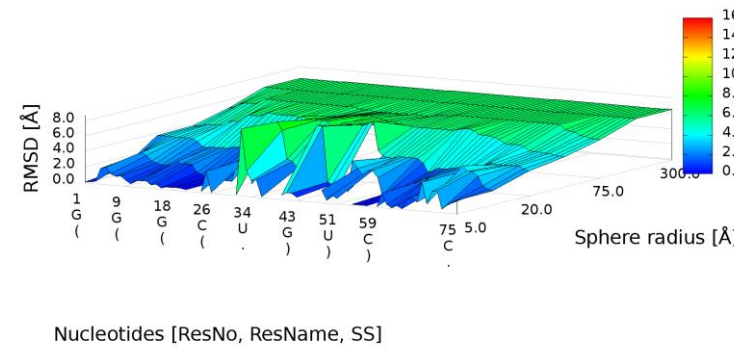

Thyreocoris.pdb

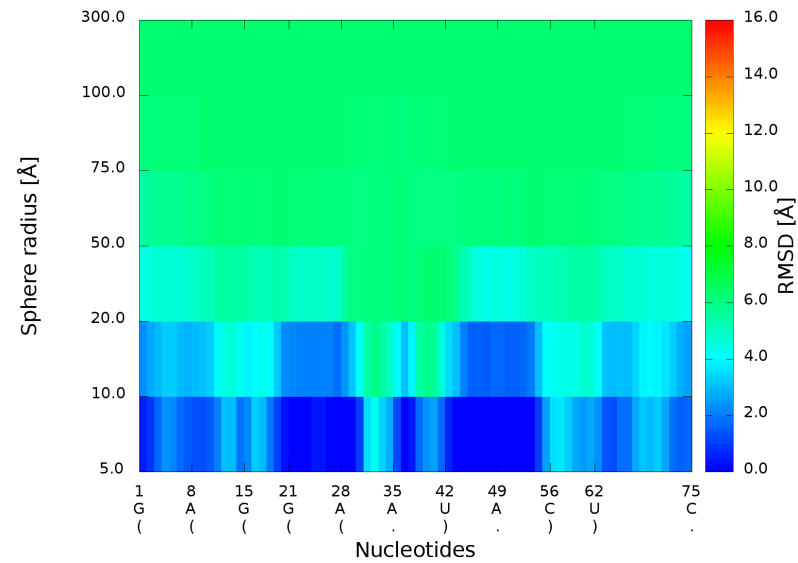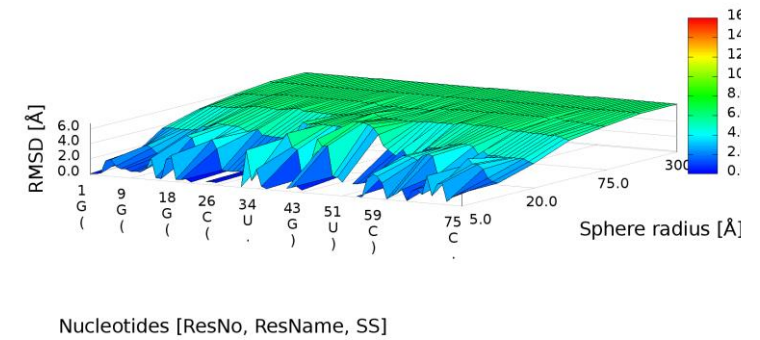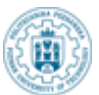

Supplement: s1 [file s1]
