# Supplementary material for: Inconsistencies in the Classification of the Family Cydnidae (Hemiptera: Heteroptera: Pentatomoidea) Revealed by Molecular Apomorphies in the Secondary and Tertiary Structures of 18S rRNA Length-Variable Region L (LVR L)
Source: MDPI journal article supplement (doi:10.3390/ijms25020939), 2024-01-11
Supplement: s1 [file s1]

File S2. Number of nucleotides in the LVR L subregions of the analysed species, with the assignment to the spermathecal types and facies recovered in the family Cydnidae and classified within the higher taxon (family, subfamily, tribe) of the superfamily Pentatomoidea.

| Subregion | Number of nucleotides | Secondary structure                                                                 | Species                                                         | Spermathecal type/facies              | Higher taxon                     |
|-----------|-----------------------|-------------------------------------------------------------------------------------|-----------------------------------------------------------------|---------------------------------------|----------------------------------|
| L(A)      | 17 (9+8)              | 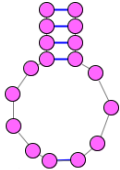   | <i>Thaumastella elizabethae</i>                                 | –                                     | Thaumastellidae                  |
|           |                       |                                                                                     | <i>Garsauria aradoides</i>                                      | garsaurinae type                      | Cydnidae: Garsaurinae            |
|           | 15 (8+7)              |    | <i>Cyrtomenus emarginatus</i><br><i>Rhytidoporus indentatus</i> | 'cydnoid' type / geotoman facies      | Cydnidae:<br>Cydninae: Geotomini |
|           |                       |                                                                                     |                                                                 |                                       |                                  |
|           | 14 (7+7)              |    | <i>Amaurocoris curtus</i>                                       | amaurocorinae type                    | Cydnidae: Amaurocorinae          |
|           |                       |                                                                                     |                                                                 |                                       |                                  |
|           |                       |   | <i>Thyreocoris scarabaeoides</i>                                | –                                     | Thyreocoridae                    |
|           |                       |                                                                                     | <i>Stibaropus indonesicus</i>                                   | 'cydnoid' type / geotoman facies      | Cydnidae: Cephalocteinae         |
|           |                       |                                                                                     | <i>Fromundus pygmaeus</i><br><i>Macroscytus badius</i>          |                                       | Cydnidae: Cydninae: Geotomini    |
|           |                       |                                                                                     | <i>Adrisa romani</i>                                            | 'cydnoid' type / adrisan facies       |                                  |
|           |                       |                                                                                     | <i>Pseudoscoparipes fraterculus</i>                             | 'cydnoid' type / scoparipan facies    |                                  |
|           |                       |                                                                                     | <i>Cydnus aterrimus</i><br><i>Chilocoris piceus</i>             | 'cydnoid' type / cydnan facies        | Cydnidae: Cydninae: Cydnini      |
|           | 12 (6+6)              |  | <i>Ochetostethomorpha secunda</i>                               | 'cydnoid' type / ochetostethan facies | Cydnidae: Sehirinae: Sehirini    |
|           |                       |                                                                                     | <i>Adomerus biguttatus</i>                                      | 'cydnoid' type / sehiran facies       | Cydnidae: Sehirinae: Sehirini    |
|           |                       |                                                                                     | <i>Parastrachia japonensis</i>                                  | –                                     | Parastrachiidae                  |
|           | 11 (10+1)             |  | <i>Amnestus zacki</i>                                           | amnestinae type                       | Cydnidae: Amnestinae             |

File S2. Number of nucleotides in the LVR L subregions of the analysed species, with the assignment to the spermathecal types and facies recovered in the family Cydnidae and classified within the higher taxon (family, subfamily, tribe) of the superfamily Pentatomoidea.

|      |           |                                                                                     |                                                                 |                                       |                               |
|------|-----------|-------------------------------------------------------------------------------------|-----------------------------------------------------------------|---------------------------------------|-------------------------------|
| L(B) | 19 (11+8) | 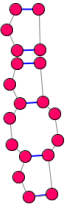   | <i>Macroscytus badius</i>                                       | 'cydnoid' type / geotoman facies      | Cydnidae: Cydninae: Geotomini |
|      | 18 (10+8) |    | <i>Cyrtomenus emarginatus</i><br><i>Rhytidoporus indentatus</i> | 'cydnoid' type / geotoman facies      | Cydnidae: Cydninae: Geotomini |
|      |           |    | <i>Adomerus biguttatus</i>                                      | 'cydnoid' type / sehiran facies       | Cydnidae: Sehirinae: Sehirini |
|      |           |                                                                                     | <i>Parastrachia japonensis</i>                                  | –                                     | Parastrachiidae               |
|      |           |   | <i>Ochetostethomorpha secunda</i>                               | 'cydnoid' type / ochetostethan facies | Cydnidae: Sehirinae: Sehirini |
|      | 17 (10+7) |  | <i>Thyreocoris scarabaeoides</i>                                | –                                     | Thyreocoridae                 |
|      | 16 (9+7)  |  | <i>Fromundus pygmaeus</i>                                       | 'cydnoid' type / geotoman facies      | Cydnidae: Cydninae: Geotomini |
|      |           |                                                                                     | <i>Adrisa romani</i>                                            | 'cydnoid' type / adrisan facies       |                               |
|      |           |                                                                                     | <i>Pseudoscoparipes fraterculus</i>                             | 'cydnoid' type / scoparipan facies    |                               |
|      |           |                                                                                     | <i>Cydnus aterrimus</i>                                         | 'cydnoid' type / cydnan facies        | Cydnidae: Cydninae: Cydnini   |

File S2. Number of nucleotides in the LVR L subregions of the analysed species, with the assignment to the spermathecal types and facies recovered in the family Cydnidae and classified within the higher taxon (family, subfamily, tribe) of the superfamily Pentatomoidea.

|      |          |                                                                                           |                                 |                                  |                             |
|------|----------|-------------------------------------------------------------------------------------------|---------------------------------|----------------------------------|-----------------------------|
| L(B) | 16 (9+7) | 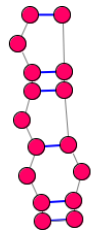<br>7    | <i>Stibaropus indonesicus</i>   | 'cydnoid' type / geotoman facies | Cydnidae: Cephalocteinae    |
|      |          | <br>8    | <i>Chilocoris piceus</i>        | 'cydnoid' type / cydnan facies   | Cydnidae: Cydninae: Cydnini |
|      |          | <br>9    | <i>Amaurocoris curtus</i>       | amaurocorinae type               | Cydnidae: Amaurocorinae     |
|      | 13 (7+6) | <br>10 | <i>Amnestus zacki</i>           | amnestinae type                  | Cydnidae: Amnestinae        |
|      | 11 (6+5) | <br>11 | <i>Garsauria aradoides</i>      | garsaurinae type                 | Cydnidae: Garsaurinae       |
| L(C) | 16 (8+8) | <br>1  | <i>Thaumastella elizabethae</i> | –                                | Thaumastellidae             |
|      | 15 (8+7) |                                                                                           | <i>Stibaropus indonesicus</i>   | 'cydnoid' type / geotoman facies | Cydnidae: Cephalocteinae    |

File S2. Number of nucleotides in the LVR L subregions of the analysed species, with the assignment to the spermathecal types and facies recovered in the family Cydnidae and classified within the higher taxon (family, subfamily, tribe) of the superfamily Pentatomoidea.

|      |          |                                                                                     |                                                            |                                       |                               |
|------|----------|-------------------------------------------------------------------------------------|------------------------------------------------------------|---------------------------------------|-------------------------------|
| L(C) | 15 (8+7) | 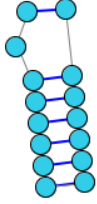   | <i>Fromundus pygmaeus</i>                                  | 'cydnoid' type / geotoman facies      | Cydnidae: Cydninae: Geotomini |
|      |          | 3                                                                                   |                                                            |                                       |                               |
|      |          |    | <i>Garsauria aradoides</i>                                 | garsaurinae type                      | Cydnidae: Garsaurinae         |
|      |          | 4                                                                                   |                                                            |                                       |                               |
|      |          |    | <i>Chilocoris piceus</i>                                   | 'cydnoid' type / cydnan facies        | Cydnidae: Cydninae: Cydnini   |
|      |          | 5                                                                                   |                                                            |                                       |                               |
|      | 14 (7+7) |  | <i>Adrisa romani</i>                                       | 'cydnoid' type / adrisan facies       | Cydnidae: Cydninae: Geotomini |
|      |          |                                                                                     | <i>Pseudoscoparipes fraterculus</i>                        | 'cydnoid' type / scoparipan facies    |                               |
|      |          |                                                                                     | <i>Adomerus buguttatus</i>                                 | 'cydnoid' type / sehiran facies       | Cydnidae: Sehirinae: Sehirini |
|      |          |                                                                                     | <i>Parastrachia japonensis</i>                             | –                                     | Parastrachiidae               |
|      |          |                                                                                     | <i>Thyreocoris scarabaeoides</i>                           | –                                     | Thyreocoridae                 |
|      |          | 6                                                                                   |                                                            |                                       |                               |
|      |          |  | <i>Ochetostethomorpha secunda</i>                          | 'cydnoid' type / ochetostethan facies | Cydnidae: Sehirinae: Sehirini |
|      |          | 7                                                                                   |                                                            |                                       |                               |
|      | 12 (6+6) |  | <i>Cyrtomenus emarginatus</i><br><i>Macroscytus badius</i> | 'cydnoid' type / geotoman facies      | Cydnidae: Cydninae: Geotomini |
|      |          |                                                                                     | <i>Amaurocoris curtus</i>                                  | amaurocorinae type                    | Cydnidae: Amaurocorinae       |
|      |          | 8                                                                                   |                                                            |                                       |                               |

File S2. Number of nucleotides in the LVR L subregions of the analysed species, with the assignment to the spermathecal types and facies recovered in the family Cydnidae and classified within the higher taxon (family, subfamily, tribe) of the superfamily Pentatomoidea.

|      |          |                                                                                     |                                     |                                       |                               |
|------|----------|-------------------------------------------------------------------------------------|-------------------------------------|---------------------------------------|-------------------------------|
| LC   | 12 (5+7) | 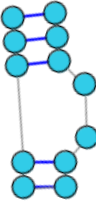   | <i>Amnestus zacki</i>               | amnestinae type                       | Cydnidae: Amnestinae          |
|      | 10 (5+5) |    | <i>Rhytidoporus indentatus</i>      | 'cydnoid' type / geotoman facies      | Cydnidae: Cydninae: Geotomini |
|      |          |                                                                                     | <i>Cydnus aterrimus</i>             | 'cydnoid' type / cydnan facies        | Cydnidae: Cydninae: Cydnini   |
| L(D) | 11 (7+4) |    | <i>Rhytidoporus indentatus</i>      | 'cydnoid' type / geotoman facies      | Cydnidae: Cydninae: Geotomini |
|      | 11 (7+4) |   | <i>Amaurocoris curtus</i>           | amaurocorinae type                    | Cydnidae: Amaurocorinae       |
|      |          |                                                                                     | <i>Chilocoris piceus</i>            | 'cydnoid' type / cydnan facies        | Cydnidae: Cydninae: Cydnini   |
|      | 10 (7+3) |  | <i>Garsauria aradoides</i>          | garsaurinae type                      | Cydnidae: Garsaurinae         |
|      |          |                                                                                     | <i>Cydnus aterrimus</i>             | 'cydnoid' type / cydnan facies        | Cydnidae: Cydninae: Cydnini   |
|      | 10 (5+5) |  | <i>Amnestus zacki</i>               | amnestinae type                       | Cydnidae: Amnestinae          |
|      | 9 (6+3)  |  | <i>Stibaropus indonesicus</i>       | 'cydnoid' type / geotoman facies      | Cydnidae: Cephalocteinae      |
|      |          |                                                                                     | <i>Fromundus pygmaeus</i>           |                                       | Cydnidae: Cydninae: Geotomini |
|      |          |                                                                                     | <i>Macroscytus badius</i>           |                                       |                               |
|      |          |                                                                                     | <i>Cyrtomenus emarginatus</i>       |                                       |                               |
|      |          |                                                                                     | <i>Adrisa romani</i>                | 'cydnoid' type / adrisan facies       | Cydnidae: Cydninae: Geotomini |
|      |          |                                                                                     | <i>Pseudoscoparipes fraterculus</i> | 'cydnoid' type / scoparipan facies    |                               |
|      |          |                                                                                     | <i>Ochetostethomorpha secunda</i>   | 'cydnoid' type / ochetostethan facies |                               |
|      |          |                                                                                     | <i>Adomerus biguttatus</i>          | 'cydnoid' type / sehiran facies       |                               |
|      |          |                                                                                     | <i>Parastrachia japonensis</i>      | –                                     | Parastrachiidae               |
|      |          |                                                                                     | <i>Thyreocoris scarabaeoides</i>    | –                                     | Thyreocoridae                 |

File S2. Number of nucleotides in the LVR L subregions of the analysed species, with the assignment to the spermathecal types and facies recovered in the family Cydnidae and classified within the higher taxon (family, subfamily, tribe) of the superfamily Pentatomoidea.

|                                     |            |                                                                                                 |                                       |                                  |                               |
|-------------------------------------|------------|-------------------------------------------------------------------------------------------------|---------------------------------------|----------------------------------|-------------------------------|
| L(D)                                | 8 (5+3)    | 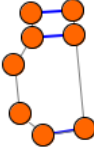<br><b>6</b>   | <i>Thaumastella elizabethae</i>       | –                                | Thaumastellidae               |
| L(E)                                | 21 (11+10) | <br><b>1</b>   | <i>Amnestus zacki</i>                 | amnestinae type                  | Cydnidae: Amnestinae          |
|                                     | 20 (10+10) | <br><b>2</b>   | <i>Thaumastella elizabethae</i>       | –                                | Thaumastellidae               |
|                                     | 19 (9+10)  | <br><b>3</b> | <i>Cydnus aterrimus</i>               | ‘cydnoid’ type / cydnan facies   | Cydnidae: Cydninae: Cydnini   |
|                                     | 18 (8+10)  | <br><b>4</b> | <i>Chilocoris piceus</i>              | ‘cydnoid’ type / cydnan facies   | Cydnidae: Cydninae: Cydnini   |
|                                     | 16 (8+8)   | <br><b>5</b> | <i>Stibaropus indonesicus</i>         | ‘cydnoid’ type / geotoman facies | Cydnidae: Cephalocteinae      |
|                                     |            |                                                                                                 | <i>Fromundus pygmaeus</i>             |                                  | Cydnidae: Cydninae: Geotomini |
| <i>Macroscytus badius</i>           |            |                                                                                                 |                                       |                                  |                               |
| <i>Cyrtomenus emarginatus</i>       |            |                                                                                                 |                                       |                                  |                               |
| <i>Adrisa romani</i>                |            |                                                                                                 | ‘cydnoid’ type / adrisan facies       |                                  |                               |
| <i>Pseudoscoparipes fraterculus</i> |            |                                                                                                 | ‘cydnoid’ type / scoparipan facies    |                                  |                               |
| <i>Ochetostethomorpha secunda</i>   |            |                                                                                                 | ‘cydnoid’ type / ochetostethan facies | Cydnidae: Sehirinae: Sehirini    |                               |

File S2. Number of nucleotides in the LVR L subregions of the analysed species, with the assignment to the spermathecal types and facies recovered in the family Cydnidae and classified within the higher taxon (family, subfamily, tribe) of the superfamily Pentatomoidea.

|      |          |                                                                                     |                                     |                                       |                               |
|------|----------|-------------------------------------------------------------------------------------|-------------------------------------|---------------------------------------|-------------------------------|
| L(E) | 15 (7+8) | 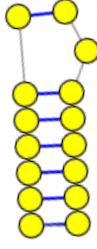   | <i>Garsauria aradoides</i>          | garsaurinae type                      | Cydnidae: Garsaurinae         |
|      | 14 (7+7) |    | <i>Amaurocoris curtus</i>           | amaurocorinae type                    | Cydnidae: Amaurocorinae       |
|      |          |                                                                                     | <i>Adomerus biguttatus</i>          | 'cydnoid' type / sehiran facies       | Cydnidae: Sehirinae: Sehirini |
|      |          |                                                                                     | <i>Parastrachia japonensis</i>      | –                                     | Parastrachiidae               |
|      |          |                                                                                     | <i>Thyreocoris scarabaeoides</i>    | –                                     | Thyreocoridae                 |
| L2   | 3        |    | <i>Thaumastella elizabethae</i>     | –                                     | Thaumastellidae               |
|      | 4        |  | <i>Stibaropus indonesicus</i>       | 'cydnoid' type / geotoman facies      | Cydnidae: Cephalocteinae      |
|      |          |                                                                                     | <i>Fromundus pygmaeus</i>           |                                       | Cydnidae: Cydninae: Geotomini |
|      |          |                                                                                     | <i>Macroscytus badius</i>           |                                       |                               |
|      |          |                                                                                     | <i>Cyrtomenus emarginatus</i>       |                                       |                               |
|      |          |                                                                                     | <i>Rhytidoporus indentatus</i>      |                                       |                               |
|      |          |                                                                                     | <i>Adrisa romani</i>                | 'cydnoid' type / adrisan facies       |                               |
|      |          |                                                                                     | <i>Pseudoscoparipes fraterculus</i> | 'cydnoid' type / scoparipan facies    |                               |
|      |          |                                                                                     | <i>Cydnus aterrimus</i>             | 'cydnoid' type / cydnan facies        | Cydnidae: Cydninae: Cydnini   |
|      |          |                                                                                     | <i>Ochetostthomorpha secunda</i>    | 'cydnoid' type / ochetostethan facies | Cydnidae: Sehirinae: Sehirini |
|      | 6        |  | <i>Amnestus zacki</i>               | amnestinae type                       | Cydnidae: Amnestinae          |
|      |          |                                                                                     | <i>Garsauria aradoides</i>          | garsaurinae type                      | Cydnidae: Garsaurinae         |
|      |          |                                                                                     | <i>Amaurocoris curtus</i>           | amaurocorinae type                    | Cydnidae: Amaurocorinae       |
|      |          |                                                                                     | <i>Parastrachia japonensis</i>      | –                                     | Parastrachiidae               |
|      |          |                                                                                     | <i>Adomerus biguttatus</i>          | 'cydnoid' type / sehiran facies       | Cydnidae: Sehirinae: Sehirini |
|      |          |                                                                                     | <i>Thyreocoris scarabaeoides</i>    | –                                     | Thyreocoridae                 |
|      | 7        |  | <i>Chilocoris piceus</i>            | 'cydnoid' type / cydnan facies        | Cydnidae: Cydninae: Cydnini   |
