# Supplementary material for: Inconsistencies in the Classification of the Family Cydnidae (Hemiptera: Heteroptera: Pentatomoidea) Revealed by Molecular Apomorphies in the Secondary and Tertiary Structures of 18S rRNA Length-Variable Region L (LVR L)
Source: MDPI journal article supplement (doi:10.3390/ijms25020939), 2024-01-11
Supplement: s1 [file s1]

Table S2. The number of nucleotides of the hypervariable region V4, the length-variable region L (LVR L), and the L2 subregion of the LVR L in the *18S rRNA* of the analysed taxa.

| Region | Number of nucleotides                             | Species                                                   | Subfamily                                    | Family          |          |
|--------|---------------------------------------------------|-----------------------------------------------------------|----------------------------------------------|-----------------|----------|
| V4     | 315                                               | <i>Thaumastella namaquensis</i> Schaefer & Wilcox, 1971   | –                                            | Thaumastellidae |          |
|        | 316                                               | <i>Amaurocoris curtus</i> (Brullé, 1838)                  | Amaurocorinae                                | Cydnidae        |          |
|        |                                                   | <i>Adrisa magna</i> (Uhler, 1861)                         | Cydninae                                     |                 |          |
|        |                                                   | <i>Adrisa romani</i> J.A. Lis, 1994                       |                                              |                 |          |
|        |                                                   | <i>Pseudoscoparipes fraterculus</i> J.A. Lis, 1994        |                                              |                 |          |
|        |                                                   | <i>Pseudoscoparipes kinabalensis</i> J.A. Lis, 1994       |                                              |                 |          |
|        |                                                   | <i>Cydnus aterrimus</i> (Forster, 1771)                   | Sehirinae                                    |                 |          |
|        |                                                   | <i>Adomerus biguttatus</i> (Linnaeus, 1758)               |                                              |                 |          |
|        |                                                   | <i>Canthophorus niveimarginatus</i> Scott, 1874           |                                              |                 |          |
|        |                                                   | <i>Sehirus luctuosus</i> Mulsant et Rey, 1866             |                                              |                 |          |
|        |                                                   | <i>Tritomegas bicolor</i> (Linnaeus, 1758)                |                                              |                 |          |
|        |                                                   | <i>Tritomegas sexmaculatus</i> (Rambur, 1839)             |                                              |                 |          |
|        |                                                   | <i>Ochetostethomorpha secunda</i> J.A. Lis & B. Lis, 2014 |                                              |                 |          |
|        |                                                   | <i>Ochetostethus opacus</i> (Scholtz, 1847)               |                                              |                 |          |
|        |                                                   | <i>Dismegistus sanguineus</i> (DeGeer, 1778)              | –                                            | Parastrachiidae |          |
|        |                                                   | <i>Parastrachia japonensis</i> (Scott, 1880)              |                                              |                 |          |
|        |                                                   | <i>Galgupha australis</i> McAtee & Malloch, 1933          | Corimelaeninae                               | Thyreocoridae   |          |
|        |                                                   | <i>Thyreocoris scarabaeoides</i> (Linnaeus, 1758)         | Thyreocorinae                                |                 |          |
|        |                                                   | 317                                                       | <i>Garsauria aradoides</i> Walker, 1868      | Garsauriinae    | Cydnidae |
|        |                                                   |                                                           | <i>Stibaropus indonesicus</i> J.A. Lis, 1991 | Cephalocteinae  |          |
|        |                                                   |                                                           | <i>Aethus holothrix</i> Linnavuori, 1977     | Cydninae        |          |
|        | <i>Aethus pseudindicus</i> J.A. Lis, 1993         |                                                           |                                              |                 |          |
|        | <i>Alonips obsoletus</i> Signoret, 1881           |                                                           |                                              |                 |          |
|        | <i>Byrsinus pseudosyriacus</i> (Linnavuori, 1977) |                                                           |                                              |                 |          |
|        | <i>Byrsinus varians</i> (Fabricius, 1803)         |                                                           |                                              |                 |          |
|        | <i>Cyrtomenus emarginatus</i> Stål, 1862          |                                                           |                                              |                 |          |
|        | <i>Fromundus pygmaeus</i> (Dallas, 1851)          |                                                           |                                              |                 |          |
|        | <i>Geotomus convexus</i> Hsiao, 1977              |                                                           |                                              |                 |          |
|        | <i>Lactistes obesipes</i> Signoret, 1879          |                                                           |                                              |                 |          |
|        | <i>Lactistes vericulatus</i> Schiødte, 1848       |                                                           |                                              |                 |          |

|       |     |                                                           |                                         |                                              |          |
|-------|-----|-----------------------------------------------------------|-----------------------------------------|----------------------------------------------|----------|
|       | 317 | <i>Macroscytus badius</i> (Walker, 1867)                  | Cydninae                                | Cydnidae                                     |          |
|       |     | <i>Macroscytus brunneus</i> (Fabricius, 1803)             |                                         |                                              |          |
|       |     | <i>Macroscytus fraterculus</i> Horváth, 1919              |                                         |                                              |          |
|       |     | <i>Microporus nigrita</i> (Fabricius, 1794)               |                                         |                                              |          |
|       |     | <i>Pangaeus bilineatus</i> (Say, 1825)                    |                                         |                                              |          |
|       |     | <i>Pangaeus rugiceps</i> Horváth, 1919                    |                                         |                                              |          |
|       |     | <i>Rhytidoporus indentatus</i> Uhler, 1877                |                                         |                                              |          |
|       | 318 | <i>Thaumastella elizabethae</i> Jacobs, 1989              | –                                       | Thaumastellidae                              |          |
|       | 324 | <i>Amnestus pusio</i> (Stål, 1860)                        | Amnestinae                              | Cydnidae                                     |          |
|       |     | <i>Amnestus zacki</i> Mayorga & Cervantes, 2009           |                                         |                                              |          |
|       |     | <i>Lattinestus barrerae</i> Mayorga & Brailovsky, 2012    |                                         |                                              |          |
|       | 325 | <i>Chilocoris confusus</i> Horváth, 1919                  | Cydninae                                | Cydnidae                                     |          |
|       |     | <i>Chilocoris laevicollis</i> Horváth, 1919               |                                         |                                              |          |
|       |     | <i>Chilocoris piceus</i> Signoret, 1884                   |                                         |                                              |          |
|       |     | <i>Parachilocoris minutus</i> (Distant, 1901)             |                                         |                                              |          |
| LVR L | 72  | <i>Thaumastella namaquensis</i> Schaefer & Wilcox, 1971   |                                         | Thaumastellidae                              |          |
|       | 73  | <i>Amaurocoris curtus</i> (Brullé, 1838)                  | Amaurocorinae                           | Cydnidae                                     |          |
|       |     | <i>Amnestus pusio</i> (Stål, 1860)                        | Amnestinae                              |                                              |          |
|       |     | <i>Amnestus zacki</i> Mayorga & Cervantes, 2009           |                                         |                                              |          |
|       |     | <i>Lattinestus barrerae</i> Mayorga & Brailovsky, 2012    |                                         |                                              |          |
|       |     | <i>Adrisa magna</i> (Uhler, 1861)                         | Cydninae                                |                                              |          |
|       |     | <i>Adrisa romani</i> J.A. Lis, 1994                       |                                         |                                              |          |
|       |     | <i>Pseudoscoparipes fraterculus</i> J.A. Lis, 1994        |                                         |                                              |          |
|       |     | <i>Pseudoscoparipes kinabalensis</i> J.A. Lis, 1994       |                                         |                                              |          |
|       |     | <i>Cydnus aterrimus</i> (Forster, 1771)                   |                                         |                                              |          |
|       |     | <i>Adomerus biguttatus</i> (Linnaeus, 1758)               | Sehirinae                               |                                              |          |
|       |     | <i>Canthophorus niveimarginatus</i> Scott, 1874           |                                         |                                              |          |
|       |     | <i>Sehirus luctuosus</i> Mulsant et Rey, 1866             |                                         |                                              |          |
|       |     | <i>Tritomegas bicolor</i> (Linnaeus, 1758)                |                                         |                                              |          |
|       |     | <i>Tritomegas sexmaculatus</i> (Rambur, 1839)             |                                         |                                              |          |
|       |     | <i>Ochetostethomorpha secunda</i> J.A. Lis & B. Lis, 2014 |                                         |                                              |          |
|       |     | <i>Ochetostethus opacus</i> (Scholtz, 1847)               |                                         |                                              |          |
|       |     | <i>Dismegistus sanguineus</i> (DeGeer, 1778)              | –                                       | Parastrachiidae                              |          |
|       |     |                                                           |                                         | <i>Parastrachia japonensis</i> (Scott, 1880) |          |
|       |     | 74                                                        | <i>Garsauria aradoidea</i> Walker, 1868 | Garsauriinae                                 | Cydnidae |

|    |   |                                                         |                |                 |               |
|----|---|---------------------------------------------------------|----------------|-----------------|---------------|
| 74 |   | <i>Stibaropus indonesicus</i> J.A. Lis, 1991            | Cephalocteinae | Cydnidae        |               |
|    |   | <i>Aethus holothrix</i> Linnavuori, 1977                | Cydninae       |                 |               |
|    |   | <i>Aethus pseudindicus</i> J.A. Lis, 1993               |                |                 |               |
|    |   | <i>Alonips obsoletus</i> Signoret, 1881                 |                |                 |               |
|    |   | <i>Byrsinus pseudosyriacus</i> (Linnavuori, 1977)       |                |                 |               |
|    |   | <i>Byrsinus varians</i> (Fabricius, 1803)               |                |                 |               |
|    |   | <i>Cyrtomenus emarginatus</i> Stål, 1862                |                |                 |               |
|    |   | <i>Fromundus pygmaeus</i> (Dallas, 1851)                |                |                 |               |
|    |   | <i>Geotomus convexus</i> Hsiao, 1977                    |                |                 |               |
|    |   | <i>Lactistes obesipes</i> Signoret, 1879                |                |                 |               |
|    |   | <i>Lactistes vericulatus</i> Schiødte, 1848             |                |                 |               |
|    |   | <i>Macroscytus badius</i> (Walker, 1867)                |                |                 |               |
|    |   | <i>Macroscytus brunneus</i> (Fabricius, 1803)           |                |                 |               |
|    |   | <i>Macroscytus fraterculus</i> Horváth, 1919            |                |                 |               |
|    |   | <i>Microporus nigrita</i> (Fabricius, 1794)             |                |                 |               |
|    |   | <i>Pangaeus bilineatus</i> (Say, 1825)                  |                |                 |               |
|    |   | <i>Pangaeus rugiceps</i> Horváth, 1919                  |                |                 |               |
|    |   | <i>Rhytidoporus indentatus</i> Uhler, 1877              |                |                 |               |
|    |   | <i>Galgupha australis</i> McAtee & Malloch, 1933        | Corimelaeninae |                 | Thyreocoridae |
|    |   | <i>Thyreocoris scarabaeoides</i> (Linnaeus, 1758)       | Thyreocorinae  |                 |               |
| 75 |   | <i>Thaumastella elizabethae</i> Jacobs, 1989            | –              | Thaumastellidae |               |
| 81 |   | <i>Chilocoris confusus</i> Horváth, 1919                | Cydninae       | Cydnidae        |               |
|    |   | <i>Chilocoris laevicollis</i> Horváth, 1919             |                |                 |               |
|    |   | <i>Chilocoris piceus</i> Signoret, 1884                 |                |                 |               |
|    |   | <i>Parachilocoris minutus</i> (Distant, 1901)           |                |                 |               |
| L2 | 3 | <i>Thaumastella elizabethae</i> Jacobs, 1989            | –              | Thaumastellidae |               |
|    |   | <i>Thaumastella namaquensis</i> Schaefer & Wilcox, 1971 |                |                 |               |
| 4  |   | <i>Stibaropus indonesicus</i> J.A. Lis, 1991            | Cephalocteinae | Cydnidae        |               |
|    |   | <i>Aethus holothrix</i> Linnavuori, 1977                | Cydninae       |                 |               |
|    |   | <i>Aethus pseudindicus</i> J.A. Lis, 1993               |                |                 |               |
|    |   | <i>Alonips obsoletus</i> Signoret, 1881                 |                |                 |               |
|    |   | <i>Byrsinus pseudosyriacus</i> (Linnavuori, 1977)       |                |                 |               |
|    |   | <i>Byrsinus varians</i> (Fabricius, 1803)               |                |                 |               |
|    |   | <i>Cyrtomenus emarginatus</i> Stål, 1862                |                |                 |               |
|    |   | <i>Fromundus pygmaeus</i> (Dallas, 1851)                |                |                 |               |

|                                                           |                                                        |                                                                                                  |          |
|-----------------------------------------------------------|--------------------------------------------------------|--------------------------------------------------------------------------------------------------|----------|
| 4                                                         | <i>Geotomus convexus</i> Hsiao, 1977                   | Cydninae                                                                                         | Cydnidae |
|                                                           | <i>Lactistes obesipes</i> Signoret, 1879               |                                                                                                  |          |
|                                                           | <i>Lactistes vericulatus</i> Schiødte, 1848            |                                                                                                  |          |
|                                                           | <i>Macroscytus badius</i> (Walker, 1867)               |                                                                                                  |          |
|                                                           | <i>Macroscytus brunneus</i> (Fabricius, 1803)          |                                                                                                  |          |
|                                                           | <i>Macroscytus fraterculus</i> Horváth, 1919           |                                                                                                  |          |
|                                                           | <i>Microporus nigrita</i> (Fabricius, 1794)            |                                                                                                  |          |
|                                                           | <i>Pangaeus bilineatus</i> (Say, 1825)                 |                                                                                                  |          |
|                                                           | <i>Pangaeus rugiceps</i> Horváth, 1919                 |                                                                                                  |          |
|                                                           | <i>Rhytidoporus indentatus</i> Uhler, 1877             |                                                                                                  |          |
|                                                           | <i>Adrisa magna</i> (Uhler, 1861)                      |                                                                                                  |          |
|                                                           | <i>Adrisa romani</i> J.A. Lis, 1994                    |                                                                                                  |          |
|                                                           | <i>Pseudoscoparipes fraterculus</i> J.A. Lis, 1994     |                                                                                                  |          |
|                                                           | <i>Pseudoscoparipes kinabalensis</i> J.A. Lis, 1994    |                                                                                                  |          |
| <i>Cydnus aterrimus</i> (Forster, 1771)                   | Sehirinae                                              |                                                                                                  |          |
| <i>Ochetostethomorpha secunda</i> J.A. Lis & B. Lis, 2014 |                                                        |                                                                                                  |          |
| 6                                                         | <i>Ochetostethus opacus</i> (Scholtz, 1847)            | Amaurocorinae<br>Garsauriinae<br>Amnestinae<br>Sehirinae<br>–<br>Corimelaeninae<br>Thyreocorinae | Cydnidae |
|                                                           | <i>Amaurocoris curtus</i> (Brullé, 1838)               |                                                                                                  |          |
|                                                           | <i>Garsauria aradoides</i> Walker, 1868                |                                                                                                  |          |
|                                                           | <i>Amnestus pusio</i> (Stål, 1860)                     |                                                                                                  |          |
|                                                           | <i>Amnestus zacki</i> Mayorga & Cervantes, 2009        |                                                                                                  |          |
|                                                           | <i>Lattinestus barrerae</i> Mayorga & Brailovsky, 2012 |                                                                                                  |          |
|                                                           | <i>Adomerus biguttatus</i> (Linnaeus, 1758)            |                                                                                                  |          |
|                                                           | <i>Canthophorus niveimarginatus</i> Scott, 1874        |                                                                                                  |          |
|                                                           | <i>Sehirus luctuosus</i> Mulsant et Rey, 1866          |                                                                                                  |          |
|                                                           | <i>Tritomegas bicolor</i> (Linnaeus, 1758)             |                                                                                                  |          |
|                                                           | <i>Tritomegas sexmaculatus</i> (Rambur, 1839)          |                                                                                                  |          |
|                                                           | <i>Dismegistus sanguineus</i> (DeGeer, 1778)           |                                                                                                  |          |
|                                                           | <i>Parastrachia japonensis</i> (Scott, 1880)           |                                                                                                  |          |
|                                                           | <i>Galgupha australis</i> McAtee & Malloch, 1933       |                                                                                                  |          |
| <i>Thyreocoris scarabaeoides</i> (Linnaeus, 1758)         |                                                        |                                                                                                  |          |
| 7                                                         | <i>Chilocoris confusus</i> Horváth, 1919               | Cydninae                                                                                         | Cydnidae |
|                                                           | <i>Chilocoris laevicollis</i> Horváth, 1919            |                                                                                                  |          |
|                                                           | <i>Chilocoris piceus</i> Signoret, 1884                |                                                                                                  |          |
|                                                           | <i>Parachilocoris minutus</i> (Distant, 1901)          |                                                                                                  |          |
