# Supplementary material for: Inconsistencies in the Classification of the Family Cydnidae (Hemiptera: Heteroptera: Pentatomoidea) Revealed by Molecular Apomorphies in the Secondary and Tertiary Structures of 18S rRNA Length-Variable Region L (LVR L)
Source: MDPI journal article supplement (doi:10.3390/ijms25020939), 2024-01-11
Supplement: s1 [file s1]

Table S3. List of species used for the study with GenBank accession numbers for 18S rDNA hypervariable region V4.

| Family   | Subfamily      | Species                                                | Geographic origin | GenBank accession number for the 18S rDNA hypervariable region V4 | Source        |
|----------|----------------|--------------------------------------------------------|-------------------|-------------------------------------------------------------------|---------------|
| Cydnidae | Amaurocorinae  | <i>Amaurocoris curtus</i> (Brullé, 1838)               | Cyprus            | OR691635                                                          | present study |
|          | Amnestinae     | <i>Amnestus pusio</i> (Stål, 1860)                     | Guatemala         | OR691636                                                          | present study |
|          |                | <i>Amnestus zacki</i> Mayorga & Cervantes, 2009        | Guatemala         | OR691637                                                          | present study |
|          |                | <i>Lattinestus barrerae</i> Mayorga & Brailovsky, 2012 | Guatemala         | OR691650                                                          | present study |
|          | Cephalocteinae | <i>Stibaropus indonesicus</i> J.A. Lis, 1991           | Brunei            | OR691659                                                          | present study |
|          | Garsauriinae   | <i>Garsauria aradoidea</i> Walker, 1868                | Brunei            | OR691647                                                          | present study |
|          | Cydniinae      | <i>Adrisa magna</i> (Uhler, 1861)                      | Japan             | KY911199                                                          | [1]           |
|          |                | <i>Adrisa romani</i> J.A. Lis, 1994                    | Thailand          | OR691631                                                          | present study |
|          |                | <i>Aethus holothrix</i> Linnavuori, 1977               | Namibia           | OR691632                                                          | present study |
|          |                | <i>Aethus pseudindicus</i> J.A. Lis, 1993              | Vietnam           | OR691633                                                          | present study |
|          |                | <i>Alonips obsoletus</i> Signoret, 1881                | Australia         | OR691634                                                          | present study |
|          |                | <i>Byrsinus pseudosyriacus</i> (Linnavuori, 1977)      | Namibia           | OR691638                                                          | present study |
|          |                | <i>Byrsinus varians</i> (Fabricius, 1803)              | Guam              | OR691639                                                          | present study |
|          |                | <i>Chilocoris confusus</i> Horváth, 1919               | Japan             | OR691641                                                          | present study |
|          |                | <i>Chilocoris laevicollis</i> Horváth, 1919            | Kenya             | OR691642                                                          | present study |
|          |                | <i>Chilocoris piceus</i> Signoret, 1884                | Thailand          | OR691643                                                          | present study |
|          |                | <i>Cydnus aterrimus</i> (Forster, 1771)                | Italy             | KY911202                                                          | [1]           |
|          |                | <i>Cyrtomenus emarginatus</i> Stål, 1862               | Guatemala         | OR691644                                                          | present study |
|          |                | <i>Fromundus pygmaeus</i> (Dallas, 1851)               | Taiwan            | KJ535871                                                          | [2]           |
|          |                | <i>Geotomus convexus</i> Hsiao, 1977                   | Japan             | KY911203                                                          | [1]           |
|          |                | <i>Lactistes obesipes</i> Signoret, 1879               | Australia         | OR691648                                                          | present study |
|          |                | <i>Lactistes vericulatus</i> Schiødte, 1848            | Zambia            | OR691649                                                          | present study |
|          |                | <i>Macroscytus badius</i> (Walker, 1867)               | India             | OR691651                                                          | present study |
|          |                | <i>Macroscytus brunneus</i> (Fabricius, 1803)          | Namibia           | KY911204                                                          | [1]           |
|          |                | <i>Macroscytus fraterculus</i> Horváth, 1919           | Japan             | OR691652                                                          | present study |
|          |                | <i>Microporus nigrita</i> (Fabricius, 1794)            | Poland            | KY911205                                                          | [1]           |
|          |                | <i>Pangaeus bilineatus</i> (Say, 1825)                 | Guatemala         | KY911207                                                          | [1]           |
|          |                | <i>Pangaeus rugiceps</i> Horváth, 1919                 | Guatemala         | OR691654                                                          | present study |
|          |                | <i>Parachilocoris minutus</i> (Distant, 1901)          | Japan             | OR691655                                                          | present study |

|                               |                |                                                           |                |          |               |
|-------------------------------|----------------|-----------------------------------------------------------|----------------|----------|---------------|
|                               |                | <i>Pseudoscoparipes fraterculus</i> J.A. Lis, 1994        | Thailand       | OR691656 | present study |
|                               |                | <i>Pseudoscoparipes kinabalensis</i> J.A. Lis, 1994       | Brunei         | OR691657 | present study |
|                               |                | <i>Rhytidoporus indentatus</i> Uhler, 1877                | Guam           | KY911208 | [1]           |
|                               | Sehirinae      | <i>Adomerus biguttatus</i> (Linnaeus, 1758)               | Poland         | KY911198 | [1]           |
|                               |                | <i>Canthophorus niveimarginatus</i> Scott, 1874           | Japan          | OR691640 | present study |
|                               |                | <i>Ochetostethomorpha secunda</i> J.A. Lis & B. Lis, 2014 | Namibia        | KY911206 | [1]           |
|                               |                | <i>Ochetostethus opacus</i> (Scholtz, 1847)               | Poland         | OR691653 | present study |
|                               |                | <i>Sehirus luctuosus</i> Mulsant et Rey, 1866             | Poland         | OR691658 | present study |
|                               |                | <i>Tritomegas bicolor</i> (Linnaeus, 1758)                | Poland         | OR691660 | present study |
|                               |                | <i>Tritomegas sexmaculatus</i> (Rambur, 1839)             | Poland         | KY911210 | [1]           |
| Parastrachiidae               |                | <i>Dismegistus sanguineus</i> (DeGeer, 1778)              | Namibia (2012) | OR691645 | present study |
|                               |                | <i>Parastrachia japonensis</i> (Scott, 1880)              | Japan          | EF641204 | [3]           |
| Thyreocoridae                 | Corimelaeninae | <i>Galgupha australis</i> McAtee & Malloch, 1933          | Bolivia        | OR691646 | present study |
|                               | Thyreocorinae  | <i>Thyreocoris scarabaeoides</i> (Linnaeus, 1758)         | Poland         | KY911214 | [1]           |
| Thaumastellidae<br>(outgroup) |                | <i>Thaumastella elizabethae</i> Jacobs, 1989              | South Africa   | EF641221 | [3]           |
|                               |                | <i>Thaumastella namaquensis</i> Schaefer & Wilcox, 1971   | South Africa   | EF641222 | [3]           |

## References

1. Lis J.A., Ziaja D., Lis B. & Gradowska P.A. 2017. Non-monophyly of the "cydnoid" complex within Pentatomoidea (Hemiptera: Heteroptera) revealed by Bayesian phylogenetic analysis of nuclear rDNA sequences. *Arthropod Systematics & Phylogeny*, **75**, 481–496.
2. Wu Y-Z., Yu S-S., Wang Y-H., Wu H-Y., Li X-R., Men X-Y., Zhang Y-W., Rédei D., Xie Q., Bu W-J. 2016. The evolutionary position of Lestoniidae revealed by molecular autapomorphies in the secondary structure of rRNA besides phylogenetic reconstruction (Insecta: Hemiptera: Heteroptera). *Zoological Journal of the Linnean Society* **1771**: 750–763.
3. Grazia J., Schuh R.T., Wheeler W.C. 2008. Phylogenetic relationships of family groups in Pentatomoidea based on morphology and DNA sequences (Insecta: Heteroptera). *Cladistics* **24**: 1–45.
