# Supplementary material for: Inconsistencies in the Classification of the Family Cydnidae (Hemiptera: Heteroptera: Pentatomoidea) Revealed by Molecular Apomorphies in the Secondary and Tertiary Structures of 18S rRNA Length-Variable Region L (LVR L)
Source: MDPI journal article supplement (doi:10.3390/ijms25020939), 2024-01-11
Supplement: s1 [file s1]

Table S1. The number of nucleotides of the hypervariable region V4, the length-variable region L (LVR L), and the L2 subregion of the LVR L in the *18S rRNA* of the analysed taxa. All analysed species of the Cydnidae were assigned to the particular groups of spermathecal types and facies recovered within the family Cydnidae [19].

| Family   | Subfamily      | Spermathecal types / facies<br>(according to [19]) | Species                                                | Number of nucleotides |       |    |
|----------|----------------|----------------------------------------------------|--------------------------------------------------------|-----------------------|-------|----|
|          |                |                                                    |                                                        | V4                    | LVR L | L2 |
| Cydnidae | Amaurocorinae  | amaurocorinae type                                 | <i>Amaurocoris curtus</i> (Brullé, 1838)               | 316                   | 73    | 6  |
|          | Amnestinae     | amnestinae type                                    | <i>Amnestus pusio</i> (Stål, 1860)                     | 324                   | 73    | 6  |
|          |                |                                                    | <i>Amnestus zacki</i> Mayorga & Cervantes, 2009        | 324                   | 73    | 6  |
|          |                |                                                    | <i>Lattinestus barrerae</i> Mayorga & Brailovsky, 2012 | 324                   | 73    | 6  |
|          | Garsauriinae   | garsauriinae type                                  | <i>Garsauria aradoides</i> Walker, 1868                | 317                   | 74    | 6  |
|          | Cephalocteinae | “cydnoid” type                                     | <i>Stibaropus indonesicus</i> J.A. Lis, 1991           | 317                   | 74    | 4  |
|          |                | geotoman facies                                    |                                                        |                       |       |    |
|          | Cydninae       | “cydnoid” type<br>geotoman facies                  | <i>Aethus holothrix</i> Linnavuori, 1977               | 317                   | 74    | 4  |
|          |                |                                                    | <i>Aethus pseudindicus</i> J.A. Lis, 1993              | 317                   | 74    | 4  |
|          |                |                                                    | <i>Alonips obsoletus</i> Signoret, 1881                | 317                   | 74    | 4  |
|          |                |                                                    | <i>Byrsinus pseudosyriacus</i> (Linnavuori, 1977)      | 317                   | 74    | 4  |
|          |                |                                                    | <i>Byrsinus varians</i> (Fabricius, 1803)              | 317                   | 74    | 4  |
|          |                |                                                    | <i>Cyrtomenus emarginatus</i> Stål, 1862               | 317                   | 74    | 4  |
|          |                |                                                    | <i>Fromundus pygmaeus</i> (Dallas, 1851)               | 317                   | 74    | 4  |
|          |                |                                                    | <i>Geotomus convexus</i> Hsiao, 1977                   | 317                   | 74    | 4  |
|          |                |                                                    | <i>Lactistes obesipes</i> Signoret, 1879               | 317                   | 74    | 4  |
|          |                |                                                    | <i>Lactistes vericulatus</i> Schiødte, 1848            | 317                   | 74    | 4  |
|          |                |                                                    | <i>Macroscytus badius</i> (Walker, 1867)               | 317                   | 74    | 4  |
|          |                |                                                    | <i>Macroscytus brunneus</i> (Fabricius, 1803)          | 317                   | 74    | 4  |
|          |                |                                                    | <i>Macroscytus fraterculus</i> Horváth, 1919           | 317                   | 74    | 4  |
|          |                |                                                    | <i>Microporus nigrita</i> (Fabricius, 1794)            | 317                   | 74    | 4  |
|          |                |                                                    | <i>Pangaeus bilineatus</i> (Say, 1825)                 | 317                   | 74    | 4  |
|          |                |                                                    | <i>Pangaeus rugiceps</i> Horváth, 1919                 | 317                   | 74    | 4  |
|          |                |                                                    | <i>Rhytidoporus indentatus</i> Uhler, 1877             | 317                   | 74    | 4  |
|          |                | “cydnoid” type<br>adrisan facies                   | <i>Adrisa magna</i> (Uhler, 1861)                      | 316                   | 73    | 4  |
|          |                |                                                    | <i>Adrisa romani</i> J.A. Lis, 1994                    | 316                   | 73    | 4  |
|          |                | “cydnoid” type<br>scoparipan facies                | <i>Pseudoscoparipes fraterculus</i> J.A. Lis, 1994     | 316                   | 73    | 4  |
|          |                |                                                    | <i>Pseudoscoparipes kinabalensis</i> J.A. Lis, 1994    | 316                   | 73    | 4  |
|          |                | “cydnoid” type<br>cydnan facies                    | <i>Chilocoris confusus</i> Horváth, 1919               | 325                   | 81    | 7  |
|          |                |                                                    | <i>Chilocoris laevicollis</i> Horváth, 1919            | 325                   | 81    | 7  |
|          |                |                                                    | <i>Chilocoris piceus</i> Signoret, 1884                | 325                   | 81    | 7  |
|          |                |                                                    | <i>Parachilocoris minutus</i> (Distant, 1901)          | 325                   | 81    | 7  |
|          |                |                                                    | <i>Cydnus aterrimus</i> (Forster, 1771)                | 316                   | 73    | 4  |
|          |                |                                                    |                                                        |                       |       |    |
|          | Sehirinae      | “cydnoid type”<br>sehiran facies                   | <i>Adomerus biguttatus</i> (Linnaeus, 1758)            | 316                   | 73    | 6  |
|          |                |                                                    | <i>Canthophorus niveimarginatus</i> Scott, 1874        | 316                   | 73    | 6  |
|          |                |                                                    | <i>Sehirus luctuosus</i> Mulsant et Rey, 1866          | 316                   | 73    | 6  |

|                 |                |                                        |                                                           |     |    |   |
|-----------------|----------------|----------------------------------------|-----------------------------------------------------------|-----|----|---|
|                 |                |                                        | <i>Tritomegas bicolor</i> (Linnaeus, 1758)                | 316 | 73 | 6 |
|                 |                |                                        | <i>Tritomegas sexmaculatus</i> (Rambur, 1839)             | 316 | 73 | 6 |
|                 |                | "cydnoid type"<br>ochetostethan facies | <i>Ochetostethomorpha secunda</i> J.A. Lis & B. Lis, 2014 | 316 | 73 | 4 |
|                 |                |                                        | <i>Ochetostethus opacus</i> (Scholtz, 1847)               | 316 | 73 | 4 |
| Parastrachiidae | –              | –                                      | <i>Dismegistus sanguineus</i> (DeGeer, 1778)              | 316 | 73 | 6 |
|                 |                |                                        | <i>Parastrachia japonensis</i> (Scott, 1880)              | 316 | 73 | 6 |
| Thyreocoridae   | Corimelaeninae | –                                      | <i>Galgupha australis</i> McAtee & Malloch, 1933          | 316 | 74 | 6 |
|                 | Thyreocorinae  | –                                      | <i>Thyreocoris scarabaeoides</i> (Linnaeus, 1758)         | 316 | 74 | 6 |
| Thaumastellidae | –              | –                                      | <i>Thaumastella elizabethae</i> Jacobs, 1989              | 318 | 75 | 3 |
| (outgroup)      |                |                                        | <i>Thaumastella namaquensis</i> Schaefer & Wilcox, 1971   | 315 | 72 | 3 |
