# Supplementary material for: Inconsistencies in the Classification of the Family Cydnidae (Hemiptera: Heteroptera: Pentatomoidea) Revealed by Molecular Apomorphies in the Secondary and Tertiary Structures of 18S rRNA Length-Variable Region L (LVR L)
Source: MDPI journal article supplement (doi:10.3390/ijms25020939), 2024-01-11
Supplement: s1 [file s1]

Table S4. List of specimens used for extraction and amplification during the present study. Their geographic origin, GenBank accession numbers, University of Opole sample numbers, and names of the persons who provided the specimens for analyses are given. All newly sequenced specimens were identified to species by the first author (JAL). Acronyms for the persons who collected or/and provided the specimens for analyses are, as follows: AT (Artur Taszakowski, University of Silesia in Katowice, Faculty of Natural Sciences, Institute of Biology, Biotechnology and Environmental Protection, Katowice, Poland), AW (Andrzej Wolski, Institute of Biology, University of Opole, Opole, Poland), BL (Barbara Lis, Institute of Biology, University of Opole, Opole, Poland), CD (Claas Damken, Stadland, Germany), HB (Harry Brailovsky, Instituto de Biología, Universidad Nacional Autónoma de México, D.F., México), HVG (Hemant V. Ghate, Modern College of Arts Science and Commerce, Shivajinagar, Pune, Maharashtra, India), LB (Luca Bartolozzi, Department of Entomology, Natural History Museum of the University of Florence, Zoological Section “La Specola”, Florence, Italy), LC (Lawrence Cockson, Warrandyte, Victoria, Australia), PJD (Paweł J. Domagała, Institute of Biology, University of Opole, Opole, Poland), RD (Roland Dobosz, Department of Natural History, Upper Silesian Museum, Bytom, Poland), RSZ (Richard S. Zack, Department of Entomology, Washington State University, Pullman, Washington, U.S.A.), SK (Shin-ichi Kudo, Department of Biology, Naruto University of Education, Naruto, Tokushima, Japan).

| Family   | Subfamily      | Tribe        | Species/subspecies                                     | Geographic origin<br>(year collected, if<br>originally provided) | GenBank<br>accession<br>numbers for<br>the 18S rDNA<br>hypervariable<br>region V4 | University of Opole<br>sample numbers for<br>newly sequenced<br>species (person who<br>provided or/and<br>collected the<br>specimen) |
|----------|----------------|--------------|--------------------------------------------------------|------------------------------------------------------------------|-----------------------------------------------------------------------------------|--------------------------------------------------------------------------------------------------------------------------------------|
| Cydnidae | Amaurocorinae  | -            | <i>Amaurocoris curtus</i> (Brullé, 1838)               | Cyprus (2015)                                                    | OR691635                                                                          | UO_226 (AT)                                                                                                                          |
|          | Amnestinae     | -            | <i>Amnestus pusio</i> (Stål, 1860)                     | Guatemala (2011)                                                 | OR691636                                                                          | UO_153Ap (RSZ)                                                                                                                       |
|          |                |              | <i>Amnestus zacki</i> Mayorga & Cervantes, 2009        | Guatemala (2010)                                                 | OR691637                                                                          | UO_134Az (RSZ)                                                                                                                       |
|          |                |              | <i>Lattinestus barrerae</i> Mayorga & Brailovsky, 2012 | Guatemala (2007)                                                 | OR691650                                                                          | UO_233Lb (HB)                                                                                                                        |
|          | Cephalocteinae | Scaptocorini | <i>Stibaropus indonesicus</i> J.A. Lis, 1991           | Brunei (2014)                                                    | OR691659                                                                          | UO_218Ssp (CD)                                                                                                                       |
|          | Garsauriinae   | -            | <i>Garsauria aradoidea</i> Walker, 1868                | Brunei (2014)                                                    | OR691647                                                                          | UO_217Ga (CD)                                                                                                                        |
|          | Cydninae       | Cydnini      | <i>Chilocoris confusus</i> Horváth, 1919               | Japan (2011)                                                     | OR691641                                                                          | UO_166 (SK)                                                                                                                          |
|          |                |              | <i>Chilocoris laevicollis</i> Horváth, 1919            | Kenya (2013)                                                     | OR691642                                                                          | UO_3Cl (LB)                                                                                                                          |
|          |                |              | <i>Chilocoris piceus</i> Signoret, 1884                | Thailand (2013)                                                  | OR691643                                                                          | UO_8Cp (AW)                                                                                                                          |
|          |                |              | <i>Parachilocoris minutus</i> (Distant, 1901)          | Japan (2011)                                                     | OR691655                                                                          | UO_168 (SK)                                                                                                                          |
|          |                | Geotomini    | <i>Alonips obsoletus</i> Signoret, 1881                | Australia (2018)                                                 | OR691634                                                                          | UO_13Ao (LC)                                                                                                                         |
|          |                |              | <i>Aethus holothrix</i> Linnavuori, 1977               | Namibia (2012)                                                   | OR691632                                                                          | UO_24Ah (RD)                                                                                                                         |
|          |                |              | <i>Aethus pseudindicus</i> J.A. Lis, 1993              | Vietnam                                                          | OR691633                                                                          | UO_7Ap (LC)                                                                                                                          |
|          |                |              | <i>Adrisa romani</i> J.A. Lis, 1994                    | Thailand (2013)                                                  | OR691631                                                                          | UO_10Ar (AW)                                                                                                                         |
|          |                |              | <i>Byrsinus pseudosyriacus</i> (Linnavuori, 1977)      | Namibia (2012)                                                   | OR691638                                                                          | UO_22Bp (RD)                                                                                                                         |
|          |                |              | <i>Byrsinus varians</i> (Fabricius, 1803)              | Guam (2004)                                                      | OR691639                                                                          | UO_149Bv (RSZ)                                                                                                                       |
|          |                |              | <i>Cyrtomenus emarginatus</i> Stål, 1862               | Guatemala (2011)                                                 | OR691644                                                                          | UO_152Ce (RSZ)                                                                                                                       |
|          |                |              | <i>Lactistes obesipes</i> Signoret, 1879               | Australia (2018)                                                 | OR691648                                                                          | UO_14Lo (LC)                                                                                                                         |

|                 |                |          |                                                     |                  |          |                |
|-----------------|----------------|----------|-----------------------------------------------------|------------------|----------|----------------|
|                 |                |          | <i>Lactistes vericulatus</i> Schiødte, 1848         | Zambia (2014)    | OR691649 | UO_15Lv (PJD)  |
|                 |                |          | <i>Macroscytus badius</i> (Walker, 1867)            | India (2013)     | OR691651 | UO_1Mb (HVG)   |
|                 |                |          | <i>Macroscytus fraterculus</i> Horváth, 1919        | Japan (2010)     | OR691652 | UO_142 (SK)    |
|                 |                |          | <i>Pangaeus rugiceps</i> Horváth, 1919              | Guatemala (2011) | OR691654 | UO_171Pr (RSZ) |
|                 |                |          | <i>Pseudoscoparipes fraterculus</i> J.A. Lis, 1994  | Thailand (2013)  | OR691656 | UO_20Pb (AW)   |
|                 |                |          | <i>Pseudoscoparipes kinabalensis</i> J.A. Lis, 1994 | Brunei (2015)    | OR691657 | UO_219Pk (CD)  |
|                 | Sehirinae      | Sehirini | <i>Canthophorus niveimarginatus</i> Scott, 1874     | Japan (2010)     | OR691640 | UO_141 (SK)    |
|                 |                |          | <i>Ochetostethus opacus</i> (Scholtz, 1847)         | Poland (2016)    | OR691653 | UO_223Oo (AT)  |
|                 |                |          | <i>Sehirus luctuosus</i> Mulsant et Rey, 1866       | Poland (2014)    | OR691658 | UO_186Sl (BL)  |
|                 |                |          | <i>Tritomegas bicolor</i> (Linnaeus, 1758)          | Poland (2011)    | OR691660 | UO_144 (BL)    |
| Parastrachiidae | -              | -        | <i>Dismegistus sanguineus</i> (De Geer, 1778)       | Namibia (2012)   | OR691645 | UO_38 (RD)     |
| Thyreocoridae   | Corimelaeninae | -        | <i>Galgupha australis</i> McAtee & Malloch, 1933    | Bolivia (2010)   | OR691646 | UO_163A (AW)   |
